RESEARCH ARTICLE

# Profiling Ethylene-Responsive Genes Expressed in the Latex of the Mature Virgin Rubber Trees Using cDNA Microarray

Zhiyi Nie, Guijuan Kang, Cuifang Duan, Yu Li, Longjun Dai, Rizhong Zeng\*

Key Laboratory of Biology and Genetic Resources of Rubber Tree, Ministry of Agriculture, Rubber Research Institute, Chinese Academy of Tropical Agricultural Sciences (CATAS), Danzhou, Hainan, China

\* [hnzrz@aliyun.com](mailto:hnzrz@aliyun.com)

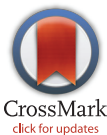

**OPEN ACCESS**

**Citation:** Nie Z, Kang G, Duan C, Li Y, Dai L, Zeng R (2016) Profiling Ethylene-Responsive Genes Expressed in the Latex of the Mature Virgin Rubber Trees Using cDNA Microarray. PLoS ONE 11(3): e0152039. doi:10.1371/journal.pone.0152039

**Editor:** Ing-Feng Chang, National Taiwan University, TAIWAN

**Received:** June 23, 2015

**Accepted:** February 22, 2016

**Published:** March 17, 2016

**Copyright:** © 2016 Nie et al. This is an open access article distributed under the terms of the [Creative Commons Attribution License](https://creativecommons.org/licenses/by/4.0/), which permits unrestricted use, distribution, and reproduction in any medium, provided the original author and source are credited.

**Data Availability Statement:** All relevant data are within the paper and its Supporting Information files.

**Funding:** The work was supported by the following: <http://www.nsf.gov.cn/>, No. 31201143, Guijuan Kang; <http://ri.catas.cn/>, No. 1630022011023, Guijuan Kang; and <http://ri.catas.cn/>, No. 1630022012008, Cuifang Duan.

**Competing Interests:** The authors have declared that no competing interests exist.

## Abstract

Ethylene is commonly used as a latex stimulant of *Hevea brasiliensis* by application of ethephon (chloro-2-ethylphosphonic acid); however, the molecular mechanism by which ethylene increases latex production is not clear. To better understand the effects of ethylene stimulation on the laticiferous cells of rubber trees, a latex expressed sequence tag (EST)-based complementary DNA microarray containing 2,973 unique genes (probes) was first developed and used to analyze the gene expression changes in the latex of the mature virgin rubber trees after ethephon treatment at three different time-points: 8, 24 and 48 h. Transcript levels of 163 genes were significantly altered with fold-change values  $\geq 2$  or  $\leq -2$  ( $q$ -value  $< 0.05$ ) in ethephon-treated rubber trees compared with control trees. Of the 163 genes, 92 were up-regulated and 71 down-regulated. The microarray results were further confirmed using real-time quantitative reverse transcript-PCR for 20 selected genes. The 163 ethylene-responsive genes were involved in several biological processes including organic substance metabolism, cellular metabolism, primary metabolism, biosynthetic process, cellular response to stimulus and stress. The presented data suggest that the laticifer water circulation, production and scavenging of reactive oxygen species, sugar metabolism, and assembly and depolymerization of the latex actin cytoskeleton might play important roles in ethylene-induced increase of latex production. The results may provide useful insights into understanding the molecular mechanism underlying the effect of ethylene on latex metabolism of *H. brasiliensis*.

## Introduction

*Hevea brasiliensis* (para rubber tree) is so far recognized as the only species producing commercially viable quantities of high-quality natural rubber (NR) [1], i.e. *cis*-1, 4-polyisoprene [2]. NR is synthesized and stored in the rubber particle [3, 4], a special organelle suspended in the latex of the special laticiferous cells that form a ubiquitous network of tubes in the phloem of rubber trees [5]. The latex is actually the cytoplasm of *H. brasiliensis* laticifers, and contains

30–50% (w/w) of NR formed from sequential condensation of IPP (isopentenyl diphosphate) units [6]. The rubber biosynthesis of rubber trees uses the basic precursor of sucrose in the laticifer's latex in a typical isoprenoid secondary metabolism [7], which is similar to the isoprenoid biosynthesis of other plant species using IPP as the precursor [8]. Many latex-expressed genes, such as HMGR (3-hydroxy-3-methylglutaryl-coenzyme A reductase), farnesyl diphosphate synthase, geranylgeranyl diphosphate synthase (GGPS), rubber elongation factor (REF), small rubber particle protein (SRPP) and *cis*-prenyltransferase (CPT) participate in the latex regeneration and rubber biosynthesis [9–16]; therefore, the gene expression profile and its kinetic change in *H. brasiliensis* laticifers is very important for investigating the related molecular events of latex metabolism and rubber biosynthesis [17].

A great deal of effort has been made to increase *H. brasiliensis* latex production and rubber yield. In the last half-century, various plant hormones and other chemicals were extensively tested to enhance latex production; and ethylene (ET), induced by application of ethephon (chloro-2-ethylphosphonic acid, a releaser of ET), was identified as the most efficient stimulant of latex production in *H. brasiliensis* [18]. Ethephon and ET gas are commonly applied as latex stimulants in rubber plantations worldwide. To better understand the physiological and molecular events by which ET increases latex yield, many studies have focused on the involvement of ET in latex regeneration and rubber biosynthesis of rubber trees [10, 19]. Two representative hypotheses have been suggested to demonstrate the roles of ET in rubber trees. One hypothesis is the enhancement of latex metabolic activity, mainly owing to the accelerated metabolic levels of sucrose and energy (ATP) in the laticiferous cells under ET stimulation [20–24]. Recent studies demonstrated that a group of latex sucrose transporters was shown to be responsible for the increased latex yield through importation of sucrose into the laticifers of rubber trees stimulated with ethephon [25–27]. The other hypothesis is prolongation of latex flow after bark tapping of the ethephon-treated rubber trees, mainly attributed to water circulation between laticifers and their surrounding tissues [28, 29]. More recently, the identified ET-responsive plasma membrane intrinsic protein (PIP) aquaporins of HbPIP2;1, HbTIP1;1 and HbPIP2;3 were found to favor prolongation of latex flow and are thus involved in ET-induced increase of latex production [30–32].

ET is a structurally simple gaseous hormone that regulates complex physiological processes of plants [33, 34]. Stimulation of rubber trees with ET is associated with marked changes in the physiology and biochemistry of the bark tissues especially the laticiferous cells, which not only induce an increase in latex production [35], but also cause some undesirable side-effects in rubber plantations. Evidence has accumulated that ET stimulation is a major factor leading to tapping panel dryness (TPD), a syndrome of no latex flow resulting in greatly decreased latex production [36–38]. However, little information is available concerning the effects of ET stimulation on induction of TPD.

Transcriptional regulation in ET response plays pivotal roles in plant physiological processes. Complementary DNA (cDNA) microarray analysis can simultaneously detect expression levels of thousands of genes [39], and is extensively used to examine plant growth and development processes, and responses to wounding and to phytohormones such as ET [40–42]. ET-responsive gene expression profiles in the laticiferous cells would orchestrate the physiological and biochemical changes that underlie the fundamental basis of the activated latex metabolism and the prolonged latex flow, and finally induce increased latex production. To monitor the comprehensive ET-responsive gene expression profile in *H. brasiliensis* laticifers, custom-designed cDNA microarrays developed from the latex expressed sequence tags (ESTs) were generated and used to analyze gene expression in the latex cells of rubber trees under ethephon stimulation. Most of the early ET-regulated genes are greatly implicated in disease and defense responses [34, 43] and consequently, in this research, three different time-points of

8, 24 and 48 h for ethephon treatment were selected to investigate the temporal cascade of the latex gene expression in response to ET, mainly focused on the transcriptional profiling of the latex ET-responsive genes that might potentially be involved in latex metabolism and rubber biosynthesis during longer periods of ET stimulation.

## Materials and Methods

### Plant materials and treatments

The rubber trees were cultivated at the experimental farm of the Chinese Academy of Tropical Agricultural Sciences (Danzhou, Hainan, China), and the study was approved by the experimental farm of the Chinese Academy of Tropical Agricultural Sciences. Field experiments were performed using mature, seven-year-old virgin (unexploited) rubber trees (Clone Reyan 7-33-97) that had never been tapped. Stimulation assays with exogenous ethephon were carried out according to the method previously described [44, 45]. Briefly, 0.5% (w/w) ethephon (Sigma-Aldrich, USA) in water was applied to the bark below the half-spiral of the tapping cut. Water was used as the mock stimulation for the control samples. The trunks of the treated trees were wrapped with black plastic film around the tapping cut and stimulated for 8, 24 or 48 h, after which they were tapped for latex early in the morning on the same day. Each sample included three independent biological replicates, and each replicate comprised the latex collected from six trees.

### Measurement of latex yield and physiological parameters

The latex yield and physiological parameters of the unexploited rubber trees were measured in October. To assay the physiological parameters, an aliquot of 20 ml of latex per tree was collected 5 min after tapping in a 50 ml centrifuge tube placed in ice, and transported to the laboratory for immediate analysis. Latex yield were measured as described by Tungngoen et al. [31]. The parameters of total solid content (TSC), thiol (RSH), and sucrose contents were determined according to Eschbach et al. [46]. Plugging index was measured according to Milford et al. [47]. The duration of latex flow was denoted that the duration from tapping to flow cessation.

### Latex total RNA extraction

Total RNAs were isolated from the latex collected at each time-point using our previously described method [44]. RNA quality and quantity were determined with a Nanodrop 2000 instrument (Thermo Scientific, Wilmington, DE, USA) and a Bioanalyzer Chip RNA 7500 series II (Agilent, Santa Clara, USA). For enrichment of ET-responsive genes, total latex RNAs from two groups of rubber trees at three different time-points were equally pooled, respectively, and used for cDNA library construction.

### Latex cDNA library construction and EST analysis

To enrich the ET-responsive genes expressed in the latex of rubber trees, total latex RNAs prepared from the latexes of the ethephon-treated rubber trees and the control samples at the three time-points of 8, 24 and 48 h were equally pooled, and used for the latex cDNA library construction [48]. Before cDNA synthesis, the pooled RNA preparations were incubated for 20 min at 37°C with 10 units of RNase-free DNase I (Roche Applied Science, USA) to remove residual genomic DNA. The cDNA synthesis and library construction were performed as previously described [48], using pBluescript II cDNA library construction kit (Stratagene, USA).

A total of 12,000 colonies were randomly selected, and plasmid DNAs were isolated and preserved in 96-well plates. The template DNAs for sequencing were amplified using the TemphiPhi DNA sequencing template amplification kit (GE Healthcare, USA). PCR products were purified using AxyPrep™ PCR cleanup kit (Axygen, USA), and subjected to single-pass sequencing from the 5'-end on an ABI 3730 DNA sequencer (Applied Biosystems, Foster City, CA, USA) using BigDye terminator cycle sequencing kit (Applied Biosystems, USA).

The EST sequences were edited manually to remove the vector contaminations, short sequences (< 100 bp) and sequences containing > 1.5% of unreadable nucleotides. All edited sequences were clustered using TGICL software [49], and then assembled using CAP3 with default settings [50]. All unigenes were annotated by comparison with the NCBI non-redundant protein sequences (nr) database (<http://www.ncbi.nlm.nih.gov/>) with the blastx algorithm using an *E*-value cut-off of  $10^{-5}$ . The latex unigenes were verified by searching the NCBI transcriptome shotgun assembly sequence database (TSA) and *H. brasiliensis* genome database that was recently sequenced and assembled by the Rubber Research Institute of China. GO (gene ontology) annotation and the GO functional classifications of these unigenes were performed using the Blast2GO program with an *E*-value threshold of  $10^{-3}$  [51].

### Latex cDNA microarray construction

A *Hevea latex* cDNA microarray was constructed in-house at CapitalBio Corporation (Beijing, China) using amplified cDNAs from the latex cDNA library. Briefly, 2973 unique sequences from the latex cDNA library were selected, and the corresponding cDNA clones were amplified by PCR using T3 and T7 primers. The amplified cDNA products were then purified, and spotted onto amino silanated glass slides using a SmartArray microarrayer (CapitalBio, Beijing, China). On one slide, there were 48 blocks and each block had 18 rows and 16 columns. In addition to the positive controls, negative controls and exogenous controls, five latex-expressed house-keeping genes were used as reference or control genes: actin (GenBank acc. No.: JF775488), 18S rRNA (GenBank acc. No.: AB268099), GAPDH (GenBank acc. No.: KR905466),  $\alpha$ -tubulin (GenBank acc. No.: KC333454) and  $\beta$ -tubulin (GenBank acc. No.: JT928408). The primers for amplification were as follows: actin (forward 5'-CAG TGG TCG TAC AAC TGG TAT-3', reverse 5'-ATC CTC CAA TCC ATA CAC TGT-3'), 18S rRNA (forward 5'-GGT CGC AAG GCT GAA ACT-3', reverse 5'-ACG GGC GGT GTG TAC AAA-3'), GAPDH (forward 5'-GAA GAT GAT GTG GTT TCC AGT G-3', reverse 5'-CAC CCA TAG AAG GCA AGG AT-3'),  $\alpha$ -tubulin (forward 5'-TGG TGA AGG CAT GGA AGA AG-3', reverse 5'-TCA TGA AAA TGA CAA ACT CTT-3') and  $\beta$ -tubulin (forward 5'-AAA GAT GAG CAC CAA GGA AGT T-3', reverse 5'-GTT CTT ATG CTC CTG GTG AAG TT-3').

### RNA amplification and labeling

In the assays of microarray hybridization, total RNAs from the latexes of ethephon-treated rubber trees at three time-points of 8, 24 and 48 h were used as three ethephon-treated samples; total RNAs from the latexes of the control rubber trees collected at corresponding three time-points were the three control samples. Each experimental sample was divided into three biological replicates in which total latex RNAs from six random rubber trees were equally pooled. Double-stranded cDNAs containing T7 RNA polymerase promoter sequence were synthesized with 5  $\mu$ g of total latex RNA using reverse transcription system, RNase H, DNase I and T4 DNA polymerase according to the manufacturer's protocol (Promega, USA). The cDNAs were then labeled with fluorescent dyes of Cy5- and Cy3-dCTP (GE Healthcare, USA) as previously described [52–54]. The resulting labeled DNAs were quantitatively adjusted based on the

efficiency of Cy5- or Cy3-dCTP incorporation and dissolved in 80  $\mu$ L of hybridization solution ( $3 \times$  SSC, 0.2% SDS, 25% formamide and  $5 \times$  Denhart's).

## Probe hybridization

Probe hybridization with the generated latex cDNA microarrays was performed in a BioMixer™ II hybridization station (CapitalBio, Beijing, China) as previously described [53, 54]. The microarray slides were hybridized with labeled DNAs prepared from three biological replicate samples for the control or ethephon-treated rubber trees. To minimize the error due to fluor-associated bias, one reciprocal (dye-swap) experiment was carried out for each of the biological samples so that a total of six data points were available for every unigene on the microarray slides. The microarray slides were hybridized overnight at 42°C, and then washed with two consecutive washing solutions (0.2% SDS,  $2 \times$  SSC at 42°C for 5 min and 0.2% SSC for 5 min at room temperature).

## Image acquisition and data analysis

After probe hybridization, microarrays were scanned with a confocal LuxScan™ scanner (CapitalBio, Beijing, China), and the data for the obtained images were extracted with SpotData software (CapitalBio, Beijing, China). Normalization and analysis of microarray data were performed using LuxScan 3.0 software (CapitalBio, Beijing, China). Faint spots with intensities  $< 400$  units after background subtraction in both Cy3 and Cy5 channels were removed for individual channel data extraction. A space- and intensity-dependent normalization was performed using the LOWESS program [55]. The differentially expressed genes were determined and analyzed using a *t*-test method and SAM software [56]. Significantly up- or down-regulated genes were filtered with fold-change values  $\geq 2$  or  $\leq -2$ , respectively, in at least one time-point with *q*-value  $\leq 0.05$  in *t*-test. The Treeview program was used to visualize the cluster data of the differentially expressed genes [57]. The microarray dataset has been submitted to the Gene Expression Omnibus database with an accession number of GSE74060.

## Validation of gene expression by real-time quantitative reverse transcript-PCR (RT-qPCR)

RT-qPCR analysis of 20 genes selected was performed as previously described [45, 58]. Briefly, total RNA from *H. brasiliensis* latex was isolated using an RNeasy plant mini-kit (Qiagen, USA) according to the manufacturer's instructions. Reverse transcription was performed with SuperScript III reverse transcriptase (Invitrogen, USA), followed by incubation with RNase H (Invitrogen, USA). Primers were designed for the selected genes with Vector NTI software (Invitrogen, USA) that provided a PCR product of  $\approx 200$  bp. The forward and reverse primer sequences used to detect each mRNA and their efficiencies are shown in S1 Table. The cDNAs were synthesized by reverse transcriptase, and quantitative gene expression analysis was carried out by RT-qPCR using a LightCycler 2.0 (Roche, Basel, Switzerland) and the following parameters: 30 s at 94°C for denaturation, followed by 45 cycles of 94°C for 5 s, 60°C for 20 s and 72°C for 20 s. Each RT-qPCR reaction was replicated three times. For normalization purposes, according to Tang et al. [27] and Li et al. [38], the *H. brasiliensis* 18S rRNA gene was used as the internal reference for all RT-qPCR analyses.

## Results

### Latex yields and physiological parameters

To get a better understanding about the effects of ethephon stimulation on the latex production of unexploited rubber trees, the latex yield and physiological parameters i.e., duration of latex flow, TSC, plugging index, contents of sucrose and RSH were firstly measured. Significant increases in the latex yield and the duration of latex flow were observed from unexploited rubber trees stimulated with ethephon for 24 h (Fig 1a and 1b), and remarkable decreases in the plugging index and the TSC were detected from unexploited rubber trees treated with ethephon after 24 h and 48 h (Fig 1c and 1d). The contents of the latex sucrose and the RSH greatly decreased in the latex of the unexploited rubber trees stimulated with ethephon for 8 h and 48 h, respectively (Fig 1e and 1f). In this research, no remarkable alterations of the latex physiological parameters were observed in the latex of the unexploited rubber trees stimulated with ethephon only for 1 h or 4 h (S1 Fig).

### *H. brasiliensis* latex cDNA library construction and ESTs analysis

The latex cDNA microarray was developed from the cDNAs of the latex-expressed genes in *H. brasiliensis* laticifers. The latex cDNA library construction and EST sequencing were the first step for the preparation of the cDNA microarray. A total of 12,000 colonies were randomly selected and sequenced from the 5'-terminus, resulting in 11,838 latex ESTs after quality editing and vector sequence removing. The 11,838 latex ESTs were then clustered and assembled into 2973 unigenes, among which 4.5% (133) had no reported homologs or showed homology to genes coding for predicted proteins ( $E$ -value  $< 1.0 \times 10^{-5}$ ) as analyzed by the blastx program against the nr database (S2 Table). In total, 1689 unigenes were assigned to GO classes with 11,513 functional terms. As shown in Fig 2, the assignments to 'biological process' were the majority (5907, 51.3%), followed by 'cellular component' (3238, 28.1%) and 'molecular function' (2368, 20.6%). Under the category 'biological process', 'metabolic process' (1426, 24.1%) and 'cellular process' (1297, 22.0%) were prominently represented. Under the classification 'cellular component', 'cell' (1181, 36.5%) and 'organelle' (925, 28.6%) were separately the first and second largest categories. Two categories, 'binding' and 'catalytic activity', were approximately 81.0% of 'molecular function'.

### Preparation of latex cDNA microarray

The entire set of cDNAs from the 2973 latex unigenes were amplified by RT-PCR, and printed on amino silane glass slides to construct the latex cDNA microarray, which contained 48 blocks and each block had 18 rows and 16 columns. All information concerning the cDNA sequence data on the microarray is available in S3 Table.

### Identification of ET-regulated genes in *H. brasiliensis* latex

This study was mainly focused on profiling of the latex ET-responsive genes in the ethephon-treated unexploited rubber trees, i.e., 8 h, 24 h and 48 h post-stimulation. Transcript levels of 163 latex genes were significantly altered with fold-change values  $\geq 2$  or  $\leq -2$  ( $q$ -value  $< 0.05$ ) in ethephon-treated compared to control rubber trees (Fig 3, Tables 1 and 2). Of these 163 genes, 92 were up-regulated (Table 1) and 71 down-regulated (Table 2). After the trees were stimulated by ethephon, 31, 58 and 18 genes were up-regulated (fold-change values  $\geq 2$ ,  $q$ -value  $< 0.05$ ) and 16, 53 and 7 genes were down-regulated (fold-change values  $\leq -2$ ,  $q$ -value  $< 0.05$ ) at 8, 24 and 48 h post-treatment, respectively (Fig 4). Among the 163 ET-induced genes, 160 had reported homologs or showed homology to genes coding for predicted proteins



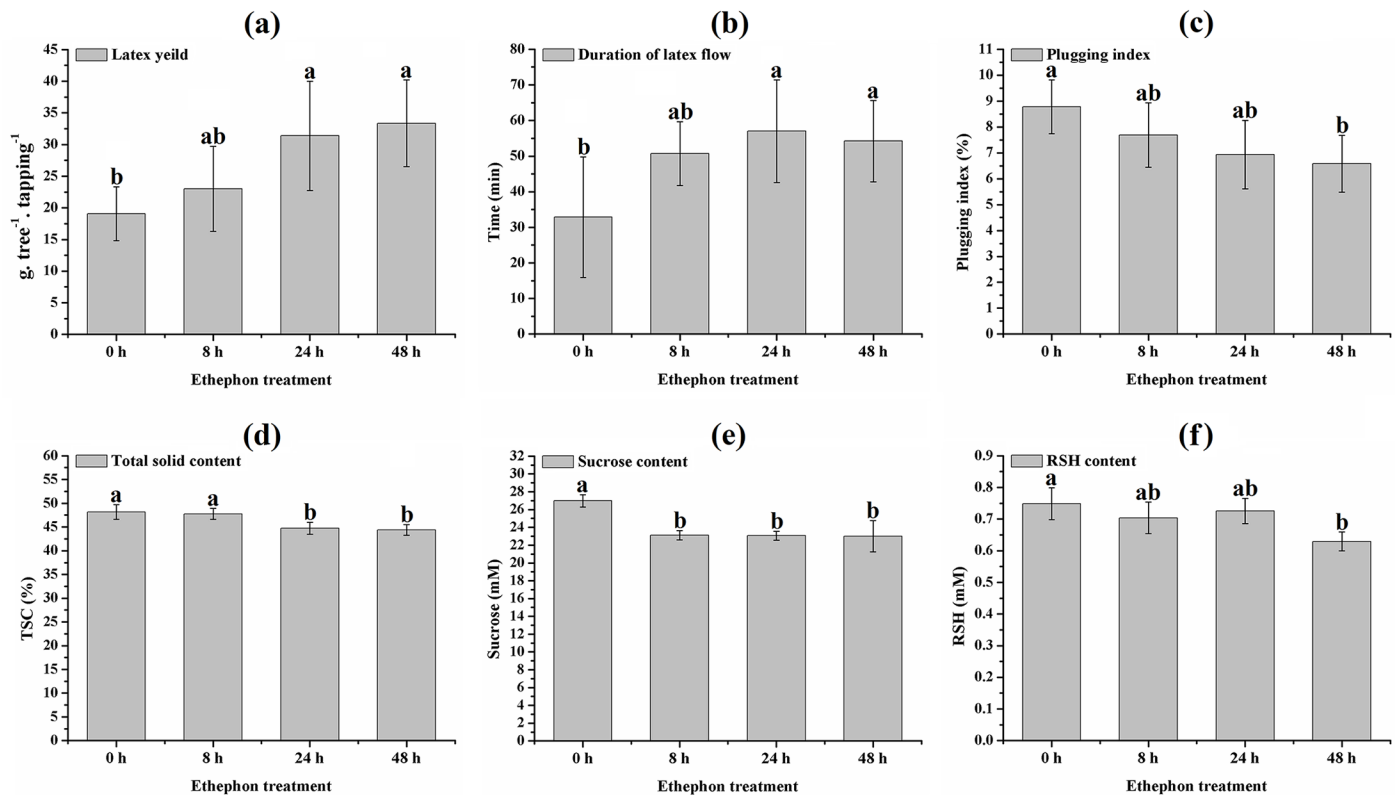

**Fig 1. Kinetics of latex yield (a), duration of latex flow (b), plugging index (c), TSC (d), sucrose content (e) and RSH content (f) in the latex of the mature virgin rubber trees treated with ethephon.** The latex yield and physiological parameters i.e., duration of latex flow, TSC, plugging index, sucrose content and RSH content were measured at 0, 8, 24 and 48 h after ethephon treatment. The values were shown as the means  $\pm$  standard deviation ( $n = 3$ ) for each including six trees. One-way ANOVA was performed using SPSS 19.0 software. The Student–Newman–Keuls test was used for multiple comparisons testing to investigate the significant differences between groups. Bars with different letters were significantly different at the  $p < 0.05$  level.

doi:10.1371/journal.pone.0152039.g001

( $E$ -value  $< 1.0 \times 10^{-5}$ ) using the blastx program against the nr database, and 92 ET-induced genes with blast matches to known proteins were assigned to GO classes. The most frequent GO terms belonging to the ‘biological process’ domains are depicted in Fig 5. Several of these terms were prominently represented, such as ‘organic substance metabolic process’, ‘primary metabolic process’, ‘cellular metabolic process’, ‘single-organism cellular process’, ‘biosynthetic process’ and ‘regulation of biological process’, indicating that some important metabolic activities and cell processes were induced by ethephon in rubber tree laticifers. Among the latex ET-induced genes that matched known proteins, a PIP gene, an AP2/ethylene response factor (ERF) super family gene and a bidirectional sugar transporter (SWEET) gene were strongly up-regulated; and a Cu/Zn superoxide dismutase (Cu/Zn SOD) gene, a cytochrome c oxidase subunit 5b-like protein (COX5B) gene and two formin-like protein gene were strongly down-regulated. This all suggested that laticifer water circulation, production and scavenging of reactive oxygen species (ROS), sugar metabolism and regulation of actin cytoskeleton assembly might play important roles in ET-induced increase of latex production in rubber trees. In order to present an overall understanding of the ethylene-mediated responses in the laticifers, the differentially expressed genes from an earlier ethephon treatment (1 h and 4 h) were provided as S4 and S5 Tables, because much fewer genes were identified with fold-change values  $\geq 2$  or  $\leq -2$  after ethephon treatment only for 1 h and 4 h.

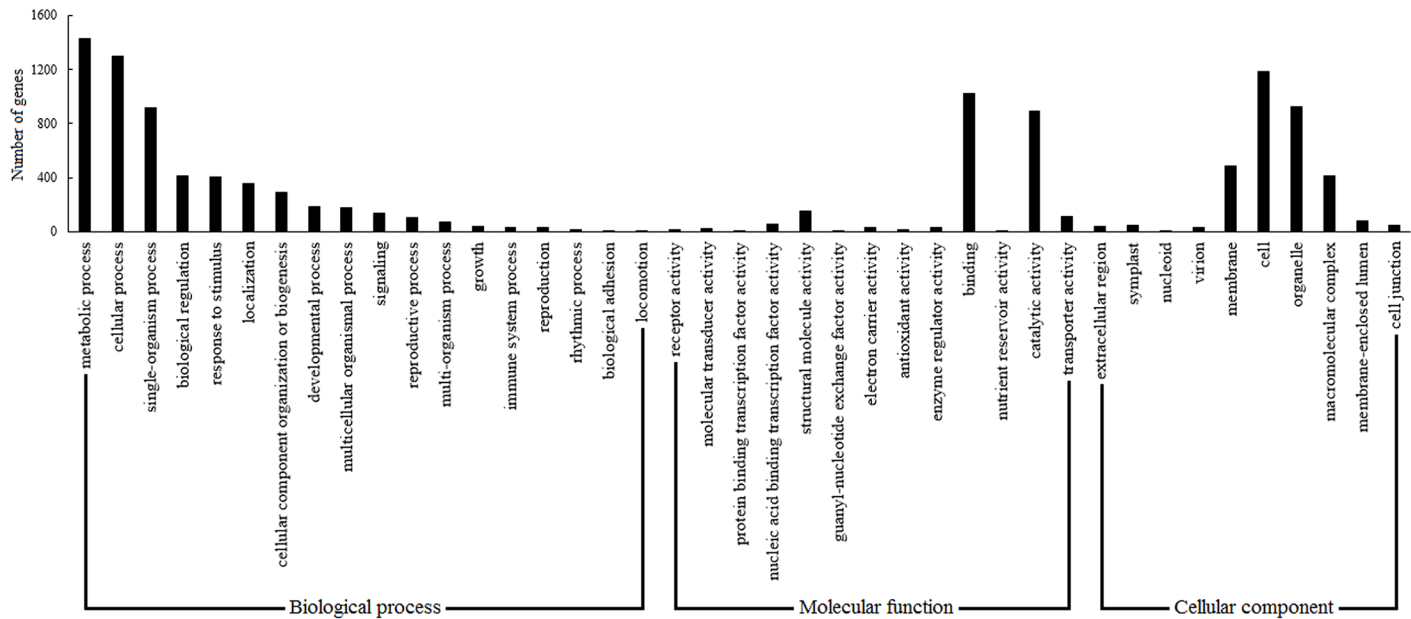

**Fig 2. GO classification of the probes used in the latex cDNA microarray.** The 1689 unigenes (probes) with significant similarity in nr protein databases were assigned to GO classifications.

doi:10.1371/journal.pone.0152039.g002

### Validation of gene expression by RT-qPCR

To validate the analysis result of the cDNA microarray, 20 ET-induced genes (selected based on cDNA microarray data) were analyzed using RT-qPCR (Fig 6). Amplification efficiencies of the selected genes primer pairs ranged within 1.75–2.011 (S1 Table). Of the 20 genes, 15 showed the same expression pattern (up- or down-regulation, significance determined by Student’s *t*-test using SPSS 19.0 software,  $p < 0.05$ ) in both cDNA microarray and RT-qPCR analysis. According to the RT-qPCR analysis, five genes (a glutaredoxin gene L2303, a profilin gene L2649, an AP2/ERF super family gene L2723 and two NAC domain-containing genes L0246 and L1918) that were not significantly different from the control (Student’s *t*-test,  $p < 0.05$ ), showed different expression patterns in cDNA microarray and RT-qPCR analysis. There was a significant correlation between the fold-changes obtained under both techniques for each same expression pattern gene ( $\rho = 0.867$ ,  $p < 0.01$ , data analyzed by Spearman’s rho using SPSS 19.0 software). Morey et al. [59] reported that correlations between microarray and RT-qPCR data can vary widely within 0.48–0.94; they also indicated that criteria for the determination of an acceptable validation of microarray results by RT-qPCR are rarely defined. Therefore, taking into account that 15 of the studied ET-induced genes showed the same expression pattern under RT-qPCR and microarray analysis, we considered our microarray data validated by RT-qPCR analysis.

### Discussion

#### ET is involved in several metabolic processes of the *H. brasiliensis* laticifers

Latex flow and *in situ* regeneration are the two primary yield-limiting factors of rubber trees, and they are closely connected with the latex physiological parameters, which reflect the metabolic activity of the laticifers [60]. The decreased levels of the plugging index and the TSC can



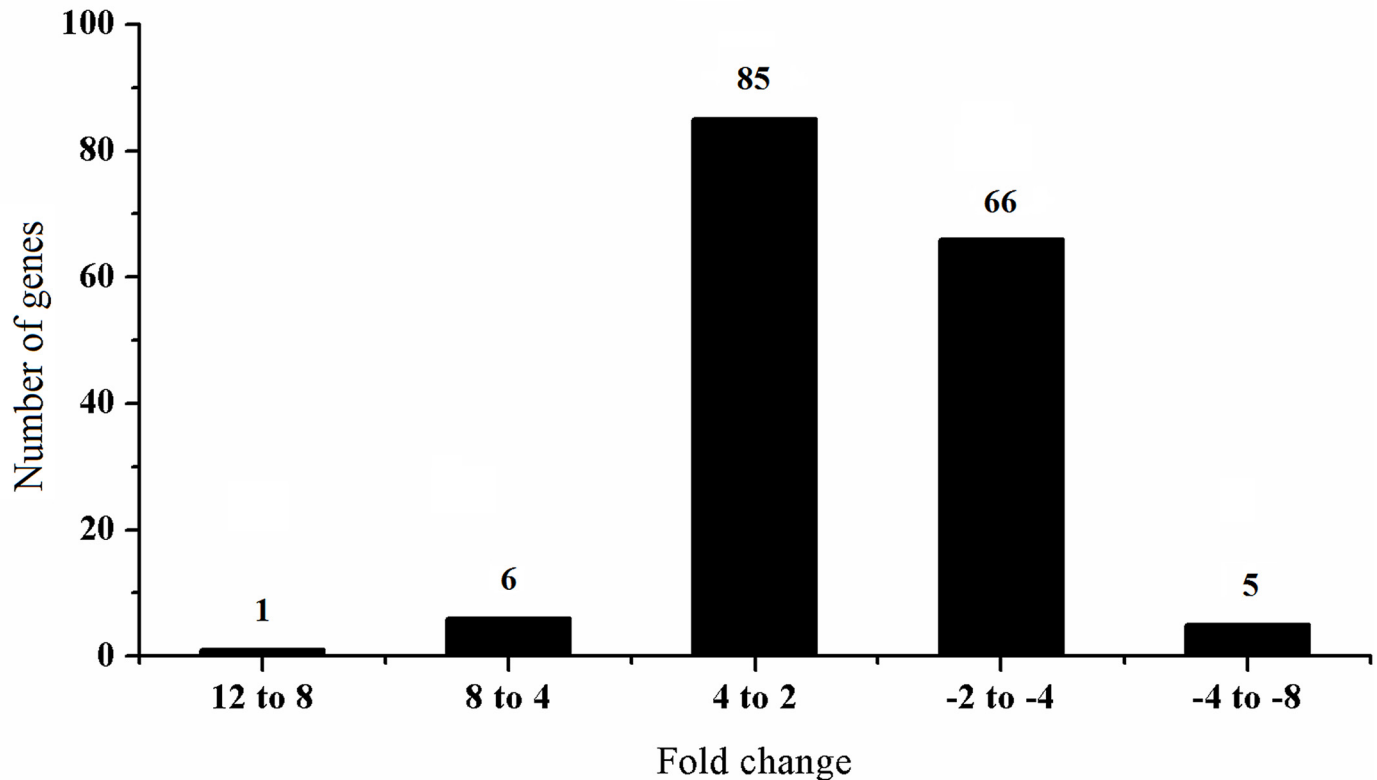

**Fig 3. Distribution of the latex genes significantly regulated by ET stimulation in rubber trees.** The fold-changes of gene expression were analyzed by cDNA microarray. The positive and negative numbers on the x-axis represented up- and down-regulation of latex genes, respectively.

doi:10.1371/journal.pone.0152039.g003

delay the plugging of latex vessels and finally favor latex flow and latex production of the ethephon-treated rubber trees [30, 31, 61–63]. Latex regeneration depends on the supply and utilization of sucrose in the rubber tree’s laticifers. A lower sucrose content in the latex after ethephon stimulation indicated an active metabolism for latex regeneration, which is related to latex production [24, 25]. Emerging evidence demonstrated that ET is employed in these physiological processes of the laticifers by regulating expression of related genes [26, 27, 30–32]. And therefore, comprehensively profiling the genes involved in the latex production would help to elucidate the underlying basis of ethylene in regulation of the latex yield of rubber trees.

### ET is not an effective regulator of rubber biosynthesis-related genes

The NR biosynthesis of rubber trees is a typical plant secondary metabolism process with the basic precursor of sucrose, followed by the mevalonate (MVA)/2-C-methyl-D-erythritol 4-phosphate (MEP) pathway, which provide the direct precursor of IPP [10]. On the rubber particle, NR is formed through sequential condensation of hundreds of thousands of IPP units and is finally compartmentalized within a special organelle suspended in the latex of the laticiferous cells of rubber trees [3, 4, 64]. In this study, the gene L0291 encoding a rubber particle-bound CPT [65] was down-regulated in the latex of ethephon-treated rubber trees compared to control. Other genes of key enzymes or proteins involved in rubber biosynthesis, such as acetyl-coenzyme A acetyltransferase (AACT), 3-hydroxy-3-methylglutaryl-coenzyme A synthase, HMGR, mevalonate kinase (MVK), GGPS, REF and SRPP, did not significantly differ from

**Table 1. Up-regulated genes under ethephon stimulation through cDNA microarray analysis.**

| Gene ID | <i>H.brasiliensis</i> homolog | Description                                                               | Fold Change |      |      | q-value |
|---------|-------------------------------|---------------------------------------------------------------------------|-------------|------|------|---------|
|         |                               |                                                                           | 8 h         | 24 h | 48 h |         |
| L0012   | JT960862.1                    | protein RALF-like 34                                                      | 1.72        | 2.38 | 1.93 | 0.00    |
| L0025   | JT949537.1                    | methylesterase 10-like                                                    | 1.73        | 4.04 | 1.14 | 0.00    |
| L0036   | JT955983.1                    | HSP20-like chaperones superfamily protein                                 | 2.38        | 2.67 | 1.12 | 0.00    |
| L0043   | JR350842.1                    | conserved hypothetical protein                                            | 1.14        | 2.01 | 1.30 | 0.00    |
| L0046   | JT930900.1                    | fatty acyl- reductase 3-like                                              | 3.40        | 1.67 | 0.91 | 0.00    |
| L0051   | JT957340.1                    | diphthamide biosynthesis protein 3-like                                   | 1.32        | 2.27 | 0.92 | 0.00    |
| L0055   | JT924152.1                    | NAC domain-containing protein 78                                          | 3.27        | 1.76 | 0.98 | 0.00    |
| L0092   | JT953466.1                    | hypothetical protein JCGZ_12701                                           | 3.10        | 1.76 | 1.53 | 0.00    |
| L0094   | JT973817.1                    | DNAJ homolog subfamily b member 6-like                                    | 1.00        | 1.13 | 2.40 | 0.00    |
| L0097   | JT934437.1                    | ARM repeat superfamily protein isoform 1                                  | 1.70        | 2.09 | 1.12 | 0.00    |
| L0129   | JT946385.1                    | hypothetical protein JCGZ_22853                                           | 2.21        | 2.47 | 1.00 | 0.01    |
| L0154   | JR364176.1                    | maturation-associated SRC1-like protein*                                  | 1.07        | 1.30 | 2.55 | 0.00    |
| L0200   |                               | AP2/ERF super family protein                                              | 1.57        | 2.28 | 1.21 | 0.00    |
| L0296   | JT939262.1                    | RING finger protein 214 isoform 1                                         | 1.48        | 2.32 | 1.01 | 0.00    |
| L0335   | JT977880.1                    | Stem-specific protein TSJT1                                               | 1.24        | 2.40 | 1.90 | 0.00    |
| L0366   | JR348559.1                    | methionine aminopeptidase 1a                                              | 1.29        | 2.14 | 1.05 | 0.00    |
| L0381   | JT924607.1                    | E3 ubiquitin-protein ligase RLIM-like                                     | 1.42        | 2.31 | 1.04 | 0.00    |
| L0383   | JT932391.1                    | probable inactive poly[ADP-ribose] polymerase SRO3                        | 1.40        | 3.05 | 1.38 | 0.00    |
| L0400   | JT961349.1                    | ubiquitin carboxyl-terminal hydrolase 12-like                             | 2.18        | 0.75 | 0.93 | 0.00    |
| L0407   | JT945196.1                    | exonuclease chloroplastic mitochondrial                                   | 1.70        | 2.96 | 1.41 | 0.00    |
| L0410   | JR348033.1                    | protein light-dependent short hypocotyls 4                                | 2.41        | 1.23 | 1.25 | 0.00    |
| L0437   | JT958324.1                    | heavy metal-associated isoprenylated plant protein 26-like                | 1.53        | 2.96 | 1.13 | 0.00    |
| L0447   | JT950737.1                    | protein n-terminal glutamine amidohydrolase                               | 1.38        | 2.24 | 1.48 | 0.00    |
| L0459   | JT930276.1                    | mitochondrial metalloendopeptidase oma1                                   | 1.26        | 2.23 | 2.38 | 0.00    |
| L0528   | JT963312.1                    | profilin 3 family protein                                                 | 1.39        | 4.75 | 2.79 | 0.00    |
| L0542   | JT962677.1                    | hypothetical protein POPTR_0018s06230g                                    | 2.01        | 1.46 | 1.10 | 0.00    |
| L0570   | JT971674.1                    | acetyltransferase at1g77540-like                                          | 2.15        | 2.29 | 1.39 | 0.00    |
| L0587   | JT938546.1                    | GTP binding protein, putative                                             | 2.05        | 1.39 | 0.97 | 0.00    |
| L0657   | JT941656.1                    | lipid phosphate phosphatase chloroplastic                                 | 0.87        | 2.02 | 1.69 | 0.00    |
| L0740   | JR344506.1                    | interferon-induced GTP-binding protein                                    | 2.11        | 1.84 | 1.38 | 0.00    |
| L0793   | JT951926.1                    | HSP40 cysteine-rich domain superfamily protein                            | 1.37        | 2.72 | 1.13 | 0.00    |
| L0814   | JT953136.1                    | latex allergen Hev b 5*                                                   | 0.98        | 1.01 | 2.27 | 0.00    |
| L0954   | JT952968.1                    | sterol carrier                                                            | 1.10        | 2.40 | 1.37 | 0.00    |
| L0965   | JT961102.1                    | zinc finger a20 and an1 domain-containing stress-associated protein 4     | 1.49        | 2.04 | 1.09 | 0.00    |
| L0990   | JT937737.1                    | nodulin family protein                                                    | 2.35        | 2.07 | 1.24 | 0.00    |
| L1016   | JT946494.1                    | uridylyate kinase                                                         | 2.75        | 1.66 | 1.23 | 0.00    |
| L1026   | JT963696.1                    | hypothetical protein JCGZ_17913                                           | 1.02        | 2.81 | 1.45 | 0.00    |
| L1029   | JT957910.1                    | vacuolar protein sorting-associated protein 25                            | 1.25        | 2.07 | 1.20 | 0.00    |
| L1068   | JT953517.1                    | dessication responsive protein                                            | 1.45        | 2.45 | 1.55 | 0.00    |
| L1127   | JR362827.1                    | ethylene-responsive element binding protein 2                             | 1.92        | 2.48 | 1.19 | 0.00    |
| L1173   | JT945540.1                    | cytochrome P450 704c1-like                                                | 2.04        | 0.55 | 0.69 | 0.00    |
| L1185   | JT962615.1                    | x-linked retinitis pigmentosa GTPase regulator-interacting protein 1-like | 2.61        | 1.67 | 0.84 | 0.00    |
| L1186   | JR364404.1                    | cysteine proteinase inhibitor                                             | 1.05        | 2.45 | 1.86 | 0.00    |
| L1343   | JR366829.1                    | sucrose transporter 1                                                     | 1.61        | 2.21 | 1.27 | 0.00    |
| L1370   | JT942690.1                    | 1-aminocyclopropane-1-carboxylate deaminase                               | 1.18        | 0.96 | 2.01 | 0.00    |
| L1401   | JT980862.1                    | conserved hypothetical protein                                            | 0.91        | 2.18 | 1.02 | 0.00    |

(Continued)

Table 1. (Continued)

| Gene ID | <i>H.brasiliensis</i> homolog | Description                                                           | Fold Change |      |      | q-value |
|---------|-------------------------------|-----------------------------------------------------------------------|-------------|------|------|---------|
|         |                               |                                                                       | 8 h         | 24 h | 48 h |         |
| L1428   | JT951761.1                    | DOF zinc finger protein                                               | 0.58        | 2.08 | 1.47 | 0.00    |
| L1433   | JT944001.1                    | fatty acid 2-hydroxylase 1-like                                       | 1.50        | 3.52 | 0.95 | 0.00    |
| L1499   | JT936619.1                    | bidirectional sugar transporter SWEET10-like                          | 1.33        | 4.90 | 0.59 | 0.00    |
| L1504   | JT962614.1                    | hypothetical protein JCGZ_11378                                       | 1.14        | 2.07 | 1.23 | 0.00    |
| L1643   | JT944734.1                    | hypothetical protein JCGZ_04721                                       | 2.43        | 1.78 | 1.28 | 0.00    |
| L1654   | JT947142.1                    | conserved hypothetical protein                                        | 1.15        | 2.10 | 1.59 | 0.00    |
| L1678   | JT951441.1                    | 18.2 kDa class I heat shock protein                                   | 2.61        | 0.93 | 1.30 | 0.00    |
| L1680   | JT948897.1                    | histone H1                                                            | 1.14        | 1.72 | 2.12 | 0.00    |
| L1716   | JT974820.1                    | hypothetical protein JCGZ_06201                                       | 1.42        | 2.31 | 1.02 | 0.00    |
| L1736   | JT939515.1                    | protein BPS1, chloroplastic-like                                      | 2.04        | 1.84 | 1.88 | 0.00    |
| L1775   | JT942366.1                    | ubiquitin                                                             | 1.05        | 2.02 | 0.98 | 0.00    |
| L1783   | JT969215.1                    | conserved hypothetical protein                                        | 1.05        | 2.86 | 1.43 | 0.00    |
| L1901   | JR364493.1                    | NAC domain-containing protein 2                                       | 1.73        | 4.57 | 2.04 | 0.00    |
| L1911   | JR344767.1                    | ETHYLENE-INSENSITIVE3 protein                                         | 2.11        | 1.72 | 1.31 | 0.00    |
| L1912   | JT950758.1                    | hypothetical protein JCGZ_11253                                       | 1.85        | 1.85 | 3.25 | 0.00    |
| L1921   | JT945335.1                    | 18.2 kDa class I heat shock family protein                            | 2.14        | 1.04 | 1.32 | 0.00    |
| L1986   | JT924225.1                    | GRAS family transcription factor (GRAS59)                             | 2.13        | 1.86 | 2.07 | 0.00    |
| L2033   | JT934826.1                    | phosphatase 2c family protein                                         | 1.62        | 2.07 | 1.01 | 0.00    |
| L2117   | JT966645.1                    | fiber protein fb11                                                    | 1.55        | 2.54 | 1.58 | 0.00    |
| L2145   | JT942483.1                    | plasma membrane intrinsic protein PIP2;3                              | 5.13        | 2.69 | 1.53 | 0.00    |
| L2170   | JR346155.1                    | triacylglycerol lipase                                                | 2.63        | 0.73 | 1.05 | 0.00    |
| L2174   | JT927768.1                    | PREDICTED: uncharacterized protein LOC104905041                       | 2.94        | 1.74 | 1.14 | 0.00    |
| L2223   | JT942604.1                    | hypothetical protein JCGZ_04721                                       | 3.48        | 2.16 | 1.08 | 0.00    |
| L2261   | JT957175.1                    | PREDICTED: uncharacterized protein LOC103953524                       | 1.08        | 2.53 | 1.32 | 0.00    |
| L2300   | JT927700.1                    | allene oxide synthase                                                 | 2.57        | 1.48 | 1.35 | 0.00    |
| L2303   | JR357022.1                    | glutaredoxin-c6-like                                                  | 1.48        | 1.55 | 2.30 | 0.01    |
| L2305   | JT940465.1                    | ubiquitin                                                             | 1.28        | 2.46 | 1.03 | 0.00    |
| L2343   | JR347496.1                    | pyruvate dehydrogenase family protein                                 | 1.12        | 2.95 | 1.30 | 0.00    |
| L2359   | JT941742.1                    | zinc finger A20 and AN1 domain-containing stress-associated protein 7 | 1.48        | 2.52 | 1.50 | 0.00    |
| L2360   | JT972872.1                    | protease inhibitor protein 1 (PI1)                                    | 1.44        | 2.10 | 1.19 | 0.00    |
| L2390   | JT951309.1                    | guanine nucleotide-binding protein subunit gamma 2-like               | 0.81        | 2.51 | 1.02 | 0.00    |
| L2412   | JR364234.1                    | chaperone protein DNAJ-related                                        | 1.15        | 2.17 | 1.16 | 0.00    |
| L2452   | JR363991.1                    | ecotropic viral integration site 5 protein                            | 1.42        | 2.71 | 1.96 | 0.00    |
| L2477   | JT945193.1                    | dehydrin protein                                                      | 1.39        | 1.31 | 2.22 | 0.00    |
| L2487   | JR366057.1                    | AP2/ERF super family protein                                          | 2.14        | 5.01 | 7.40 | 0.00    |
| L2497   | JT935376.1                    | AP2/ERF super family protein                                          | 1.15        | 1.44 | 2.38 | 0.00    |
| L2522   | JR355065.1                    | conserved hypothetical protein                                        | 7.15        | 8.27 | 2.78 | 0.00    |
| L2648   | JT962967.1                    | hypothetical protein JCGZ_10888                                       | 2.02        | 1.30 | 0.79 | 0.00    |
| L2649   | JT959274.1                    | profilin 5                                                            | 1.14        | 2.11 | 1.38 | 0.00    |
| L2677   | JR359565.1                    | 23.6 kDa heat shock, mitochondrial -like protein                      | 1.68        | 2.06 | 1.45 | 0.00    |
| L2682   | JT957840.1                    | F-box/LRR-repeat protein at3g26922-like                               | 1.07        | 2.07 | 1.91 | 0.00    |
| L2721   |                               | SAUR family protein                                                   | 2.22        | 1.53 | 1.05 | 0.00    |
| L2723   | JT951227.1                    | AP2/ERF super family protein                                          | 1.84        | 1.16 | 2.75 | 0.00    |
| L2773   | JR365113.1                    | gata zinc finger domain-containing protein                            | 1.29        | 1.58 | 2.02 | 0.00    |
| L2914   | JT952575.1                    | probable ribose-5-phosphate isomerase 2                               | 2.13        | 2.93 | 1.13 | 0.00    |

(Continued)

Table 1. (Continued)

| Gene ID | <i>H.brasiliensis</i> homolog | Description                              | Fold Change |      |      | q-value |
|---------|-------------------------------|------------------------------------------|-------------|------|------|---------|
|         |                               |                                          | 8 h         | 24 h | 48 h |         |
| L2924   | JR366554.1                    | fasciclin-like arabinogalactan protein 8 | 0.84        | 1.95 | 2.09 | 0.00    |

\*The unigene was annotated by comparison with the NCBI Non-redundant protein sequences (nr) database (<http://www.ncbi.nlm.nih.gov/>) with the BlastN algorithm using an *E*-value cut-off of  $10^{-5}$ .

doi:10.1371/journal.pone.0152039.t001

controls (fold-changes  $\geq 2$  or  $\leq -2$ , *q*-value  $< 0.05$ ) (Table 3). The results showed that the NR biosynthesis of rubber trees might not be directly regulated by ET.

### ET signal transduction-related genes are controlled by ethephon

ET plays an important role as a signaling molecule in plant development and stress response. Many proteins, such as ethylene resistant 1 (ETR1) [66], constitutive triple response 1 (CTR1) [67], ethylene insensitive 2 (EIN2) [68], ethylene insensitive 3 (EIN3) [69, 70] and ERF [70], participate in the plant ET signal transduction. The various members of the ET signaling transduction-related genes in the laticiferous cells of rubber trees are differentially regulated by ethephon treatment. In this study, five genes probably involved in ET signal transduction were identified. The latex gene L1911 encoding EIN3 was up-regulated in the ethephon-treated rubber trees. EIN3 is a novel nuclear protein, located downstream of the ET signal transduction pathway, that binds to the promoter of ERF gene and activates its transcription in an ET-dependent manner [71, 72]. Four latex genes, L0200, L1127, L2487 and L2497 encoding members of the AP2/ERF super family protein, were all up-regulated by ethephon stimulation. Transcription factors ERF1 and other AP2/ERF super family proteins can interact with the GCC box or CRT/DRE element in the promoter of target genes and activate downstream ET responses [71–73]. It was reported that the up-regulation of EIN3 and ERFs may play important roles in ET signal transduction of laticiferous cells in rubber trees. In addition, two genes, L0055 and L1901 encoding NAC domain-containing proteins were up-regulated. NAC domain-containing proteins are plant-specific transcription factors that play vital roles in plant development, stress responses and various metabolic processes. The expression of some NAC domain-containing proteins can be regulated by ET. Of the two genes, L1901 is a close homolog of *A. thaliana* NAC2, which is involved in ET signal transduction and regulated by EIN3 [74]. Further research would give insight into the biological functions that the NAC gene performs in increasing the latex metabolism of rubber trees stimulated with ethephon, which would reveal molecular mechanisms by which ET signal transduction regulates the latex metabolism of *H. brasiliensis*.

### ET down-regulates expression of ROS scavenging-related genes

ROS are the byproducts of plant aerobic metabolism, and are considered to have both harmful and beneficial functions in many physiological processes of plants. As important plant cell signaling molecules, ROS are involved in responses to biotic and abiotic stresses and in developmental and physiological processes. However, as toxic molecules that cause oxidative damage to lipids, proteins and nucleic acids, ROS can injure cells [75]. Under physiological steady-state conditions, ROS are scavenged by several anti-oxidative defense components, thereby maintaining a balance between ROS production and scavenging [76]. This equilibrium may be perturbed by a number of adverse environmental factors that generate ROS by activating various

**Table 2. Down-regulated genes under ethephon stimulation through cDNA microarray analysis.**

| Gene ID | <i>H.brasiliensis</i> homolog | Description                                                    | Fold Change |      |      | q-value |
|---------|-------------------------------|----------------------------------------------------------------|-------------|------|------|---------|
|         |                               |                                                                | 8 h         | 24 h | 48 h |         |
| L0013   | JT916877.1                    | enolase-phosphatase e1-like                                    | 1.00        | 0.50 | 0.97 | 0.01    |
| L0026   | JT929934.1                    | F-box protein skip16                                           | 0.97        | 0.49 | 0.80 | 0.00    |
| L0031   | JT941097.1                    | U-box domain-containing protein 3                              | 1.00        | 0.44 | 0.62 | 0.00    |
| L0060   | JT940201.1                    | fasciclin-like arabinogalactan protein 7                       | 0.27        | 0.62 | 1.75 | 0.00    |
| L0104   | JT962900.1                    | acyl-CoA-binding protein                                       | 1.06        | 0.47 | 0.58 | 0.00    |
| L0112   | JT939599.1                    | endonuclease V                                                 | 1.17        | 0.48 | 0.86 | 0.00    |
| L0118   | JT949014.1                    | cytochrome c oxidase subunit 5b-like                           | 0.42        | 0.18 | 0.73 | 0.00    |
| L0140   | JT932367.1                    | proton-coupled amino acid transporter 3-like                   | 0.56        | 0.28 | 0.69 | 0.00    |
| L0203   | JT950602.1                    | elicitor-responsive protein 1-like                             | 1.01        | 0.46 | 0.89 | 0.00    |
| L0208   | JT927484.1                    | B2 protein                                                     | 0.83        | 0.36 | 0.77 | 0.00    |
| L0236   |                               | casbene chloroplast                                            | 0.97        | 0.33 | 0.77 | 0.00    |
| L0246   | JT936642.1                    | NAC domain-containing protein 8-like                           | 0.74        | 0.44 | 0.69 | 0.00    |
| L0283   | JT915455.1                    | copia protein                                                  | 0.99        | 1.11 | 0.46 | 0.02    |
| L0291   |                               | cis-prenyltransferase                                          | 0.99        | 0.41 | 0.79 | 0.00    |
| L0331   | JT942435.1                    | calcium-binding ef hand family protein                         | 0.35        | 1.02 | 0.80 | 0.00    |
| L0380   | JT945417.1                    | zinc finger family protein                                     | 0.76        | 0.50 | 0.46 | 0.00    |
| L0433   | JT971783.1                    | ubiquitin extension protein 1                                  | 0.64        | 0.35 | 0.57 | 0.00    |
| L0442   | JT914930.1                    | kinase family protein                                          | 1.30        | 0.46 | 0.78 | 0.00    |
| L0448   | JT935206.1                    | biotin protein ligase                                          | 0.64        | 0.54 | 0.47 | 0.00    |
| L0457   | JR365945.1                    | ethylene-inducible protein (ER1)                               | 0.50        | 0.56 | 0.66 | 0.00    |
| L0506   | JT942847.1                    | caffeic acid o-methyltransferase                               | 0.88        | 0.46 | 1.11 | 0.00    |
| L0686   | JR347987.1                    | selenoprotein h-like                                           | 0.85        | 0.49 | 0.81 | 0.00    |
| L0698   | JT926734.1                    | aspartic proteinase precursor                                  | 0.64        | 0.47 | 0.65 | 0.00    |
| L0792   | JT924112.1                    | probable alpha-amylase 2                                       | 0.85        | 0.49 | 0.61 | 0.00    |
| L0799   | JT944013.1                    | gibberellin receptor                                           | 0.39        | 0.95 | 0.85 | 0.00    |
| L0801   | JT942867.1                    | DUF593-containing protein                                      | 0.52        | 0.46 | 0.74 | 0.00    |
| L0807   | JT924572.1                    | inositol transporter 4 like protein                            | 1.05        | 0.44 | 1.26 | 0.02    |
| L0815   | JT943548.1                    | DNAJ chaperone c-terminal domain-containing family protein     | 0.84        | 0.40 | 0.54 | 0.00    |
| L0838   | JT916724.1                    | autophagy-related protein 18f-like                             | 0.58        | 0.45 | 0.69 | 0.00    |
| L0891   | JT966473.1                    | dynein light chain cytoplasmic-like                            | 0.44        | 1.75 | 1.05 | 0.00    |
| L0960   | JT945149.1                    | two-component response regulator arr5-like                     | 0.42        | 0.81 | 1.42 | 0.00    |
| L0994   | JT945230.1                    | conserved hypothetical protein                                 | 1.06        | 0.35 | 0.94 | 0.00    |
| L1049   | JT945364.1                    | glutamine amido-transferase YLR126C                            | 1.40        | 0.49 | 0.67 | 0.00    |
| L1170   | JR360041.1                    | LOB domain-containing protein 37-like                          | 1.05        | 0.43 | 0.83 | 0.00    |
| L1198   | JT950118.1                    | conserved hypothetical protein                                 | 1.03        | 0.49 | 0.78 | 0.00    |
| L1227   | JR345627.1                    | hypothetical protein JCGZ_08192                                | 0.23        | 0.91 | 1.66 | 0.00    |
| L1233   | JT962766.1                    | Cu/Zn superoxide dismutase                                     | 1.06        | 0.32 | 0.51 | 0.00    |
| L1330   | JT936894.1                    | myosin phosphatase rho-interacting                             | 1.14        | 0.44 | 0.97 | 0.00    |
| L1525   | JT915944.1                    | multiple C2 and transmembrane domain-containing protein 1-like | 0.98        | 0.38 | 0.89 | 0.00    |
| L1579   | JT960330.1                    | epidermal patterning factor-like protein 3                     | 0.72        | 0.49 | 1.03 | 0.00    |
| L1607   | JT940720.1                    | endonuclease or glycosyl hydrolase                             | 0.73        | 0.42 | 0.76 | 0.00    |
| L1645   | JT925274.1                    | UDP-D-glucuronate 4-epimerase 6                                | 0.37        | 0.55 | 0.79 | 0.00    |
| L1756   | JT950231.1                    | hypothetical protein POPTR_0002s08440g                         | 0.70        | 0.48 | 0.60 | 0.00    |
| L1809   | JT941974.1                    | formin-like protein 18                                         | 0.25        | 0.62 | 0.94 | 0.00    |
| L1810   | JR366157.1                    | probable phospholipid hydroperoxide glutathione peroxidase     | 0.79        | 0.48 | 0.81 | 0.00    |
| L1831   | JT931867.1                    | SOUL heme-binding family protein                               | 1.22        | 0.41 | 1.04 | 0.00    |

(Continued)

Table 2. (Continued)

| Gene ID | <i>H.brasiliensis</i> homolog | Description                                                        | Fold Change |      |      | q-value |
|---------|-------------------------------|--------------------------------------------------------------------|-------------|------|------|---------|
|         |                               |                                                                    | 8 h         | 24 h | 48 h |         |
| L1845   | JT915709.1                    | structural constituent of nuclear pore, putative                   | 0.84        | 0.43 | 0.63 | 0.00    |
| L1853   | JT953751.1                    | SAUR family protein (SAUR23)                                       | 0.43        | 0.59 | 1.54 | 0.00    |
| L1890   | JT933643.1                    | hypothetical protein JCGZ_17861                                    | 0.67        | 0.34 | 0.54 | 0.00    |
| L1906   | JT966408.1                    | protein RALF-like 24                                               | 0.49        | 0.73 | 0.77 | 0.00    |
| L1909   | JT919017.1                    | mannan endo-1, 4-beta-mannosidase 7-like                           | 0.63        | 0.47 | 0.74 | 0.00    |
| L1914   | JT958801.1                    | NUC-1 negative regulatory protein                                  | 0.80        | 0.37 | 0.96 | 0.00    |
| L1918   | JT937667.1                    | NAC domain-containing protein                                      | 0.44        | 0.42 | 0.79 | 0.00    |
| L1925   | JT944694.1                    | plasma membrane intrinsic protein isoform 1                        | 0.87        | 0.58 | 0.42 | 0.00    |
| L2068   | JT955937.1                    | thioredoxin h                                                      | 1.30        | 0.49 | 0.72 | 0.00    |
| L2116   | JT962238.1                    | mitochondrial import inner membrane translocase subunit TIM13-like | 1.17        | 0.93 | 0.44 | 0.00    |
| L2188   | JT925241.1                    | cysteine desulfurylase                                             | 1.09        | 0.39 | 0.64 | 0.00    |
| L2191   | JT929780.1                    | probable WRKY transcription factor 21                              | 0.35        | 0.29 | 0.69 | 0.00    |
| L2279   | JR366494.1                    | basic leucine zipper 9-like                                        | 1.12        | 0.46 | 0.90 | 0.00    |
| L2396   | JT948911.1                    | short-chain dehydrogenase/reductase                                | 1.24        | 0.23 | 0.61 | 0.00    |
| L2471   | JT959931.1                    | formin-like protein 4                                              | 1.01        | 0.28 | 0.45 | 0.00    |
| L2527   | JT948191.1                    | late embryogenesis abundant hydroxyproline-rich glycoprotein       | 1.16        | 0.47 | 0.81 | 0.00    |
| L2557   | JT951143.1                    | conserved hypothetical protein                                     | 1.27        | 0.37 | 0.88 | 0.00    |
| L2691   | JT928560.1                    | C2 domain-containing family protein                                | 0.63        | 0.49 | 0.80 | 0.00    |
| L2712   | JT963599.1                    | MLP-like protein 329                                               | 1.10        | 0.86 | 0.47 | 0.00    |
| L2724   | JT942002.1                    | MAP 7 domain-containing protein 1-like                             | 0.93        | 0.47 | 0.78 | 0.00    |
| L2735   | JT928745.1                    | ribosomal protein L16                                              | 0.52        | 0.37 | 0.60 | 0.00    |
| L2759   | JR349544.1                    | conserved hypothetical protein 12                                  | 0.47        | 0.61 | 0.70 | 0.00    |
| L2760   | JT935810.1                    | hypothetical protein JCGZ_18332                                    | 0.34        | 0.54 | 0.72 | 0.00    |
| L2804   | JT952582.1                    | RNA exonuclease 3                                                  | 0.87        | 0.42 | 0.82 | 0.00    |
| L2817   | JT956946.1                    | peroxiredoxin family protein                                       | 1.17        | 0.44 | 0.72 | 0.00    |

doi:10.1371/journal.pone.0152039.t002

oxidases and peroxidases, or lead to the rapid accumulation of ROS known as an oxidative burst [77]. In this study, a significant decrease in RSH content of latex was observed after ethephon stimulation (Fig 1f) in unexploited rubber trees, and analysis of gene expression showed that seven latex genes probably involved in scavenging ROS were down-regulated in ethephon-treated rubber trees within 24 h, including COX5B gene (L0118), selenoprotein h-like protein gene (L0686), Cu/Zn SOD gene (L1233), glycosyl hydrolase family gene (L1607), phospholipid hydroperoxide glutathione peroxidase gene (L1810), thioredoxin h gene (L2068) and peroxiredoxin family protein gene (L2817) (Table 1). In the latex of ethephon-treated rubber trees, the NAD(P)H oxidase activities increased [36], whereas the expression level of ROS scavenging-related genes decreased, which may break the equilibrium between producing and scavenging of ROS, and result in rapid accumulation of ROS. Previous studies demonstrated that higher ROS levels can stimulate the production of endogenous ET [78, 79] in exploited rubber trees laticifers and was shown to be involved in latex yield [80]; however, excessive ROS accumulation can damage the laticifers and initiate programmed cell death (PCD) of the *H. brasiliensis* laticifers, which may lead to TPD [36, 38]. Taken all the data together a possible mechanism is suggested that the TPD of rubber trees might be caused by excessive ET stimulation, since ET can inhibit the expression of ROS scavenging-related genes, which might break the balance between producing and scavenging of ROS, and lead to excessive ROS accumulation in the laticifers and ultimately induce the TPD.



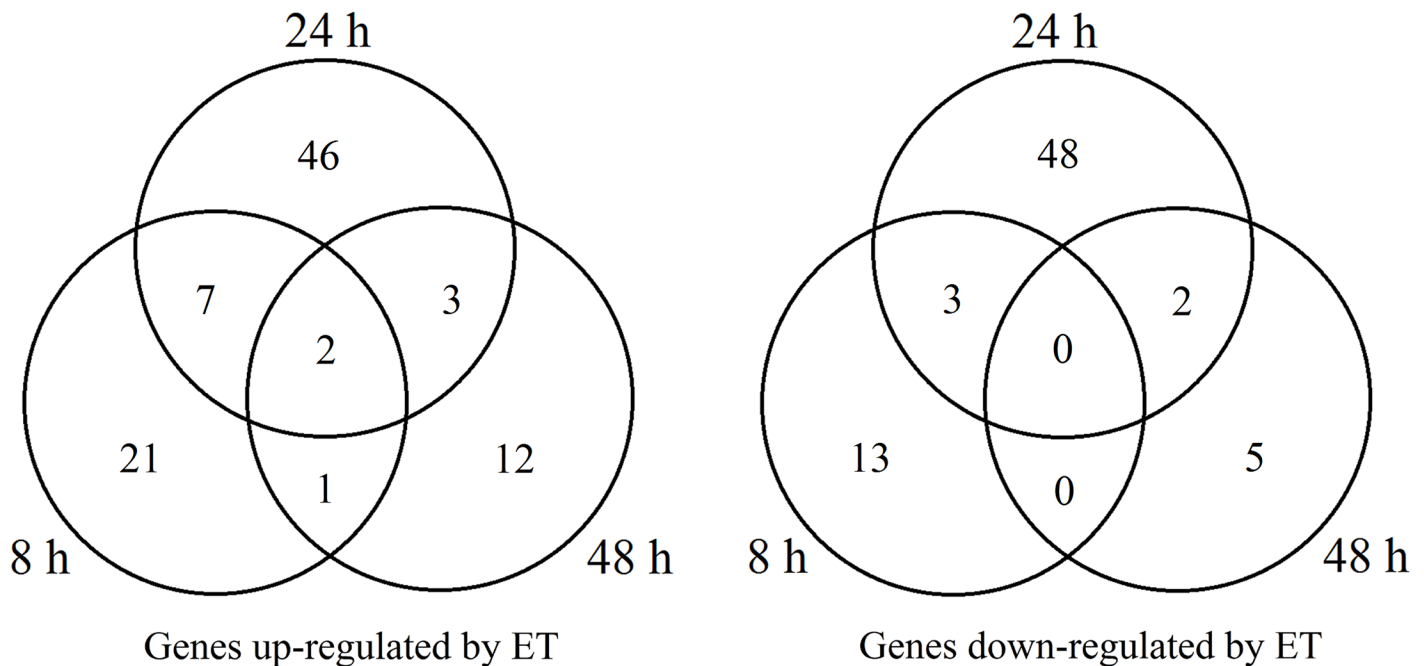

**Fig 4. Venn diagram analysis for the ET-responsive genes under the different times of ET treatment.** Overlapping circles visually represented the commonalities among sets of information. The number of differentially expressed genes shared by different time-points (8, 24 and 48 h) under ET treatment was displayed in the overlapping circles.

doi:10.1371/journal.pone.0152039.g004

### ET up-regulates expression of sugar metabolism-related genes

Latex regeneration and rubber biosynthesis occur in the cytoplasm of highly specialized latex cells and requires sucrose as the unique precursor. ET stimulation of latex production results in high sugar flow from the surrounding cells of the inner bark towards the latex cells [20–24]. Latex is harvested by bark tapping that is a regular abiotic mechanical stress for the exploited rubber trees. Bark tapping can activate the latex cells to regenerate lost cytoplasm after latex expulsion, which causes a higher sucrose demand in the laticifers of exploited rubber trees compared to unexploited rubber trees [27]. In this study, a significant decrease in the sucrose content of latex was observed in unexploited rubber trees after ethephon stimulation (Fig 1e), and gene expression analysis showed that two genes probably involved in sucrose transport (SUT) were up-regulated in ethephon-treated unexploited rubber trees. The first SUT gene was L1343 that matched HbSUT1, which is related to sucrose importation into laticifers. Latex production of the ET-stimulated rubber trees was associated with high gene expression of putative sucrose transporter HbSUT1 in the unexploited rubber tree [25]. The second was a potential sugar transporter SWEET10-like gene (L1499) that was involved in multiple physiological processes by facilitating ion transport via interaction with ion transporters or as sugar transporters [81, 82], and this gene was strongly up-regulated in the laticifers of the ethephon-treated unexploited rubber trees. In addition, the L2343 encoding pyruvate dehydrogenase that catalyzes the pivotal irreversible reaction of glucose metabolism in the aerobic energy-generating pathways [83] was also up-regulated in ethephon-treated rubber trees. These results indicate that the ET stimulation of latex production was associated with accelerating the importation and metabolism of sugar, especially sucrose which improves the supply of carbon (e.g. acetyl-CoA) and energy (e.g. ATP) for rubber biosynthesis in laticifers of rubber trees.

(a) Genes up-regulated by ET (b) Genes down-regulated by ET

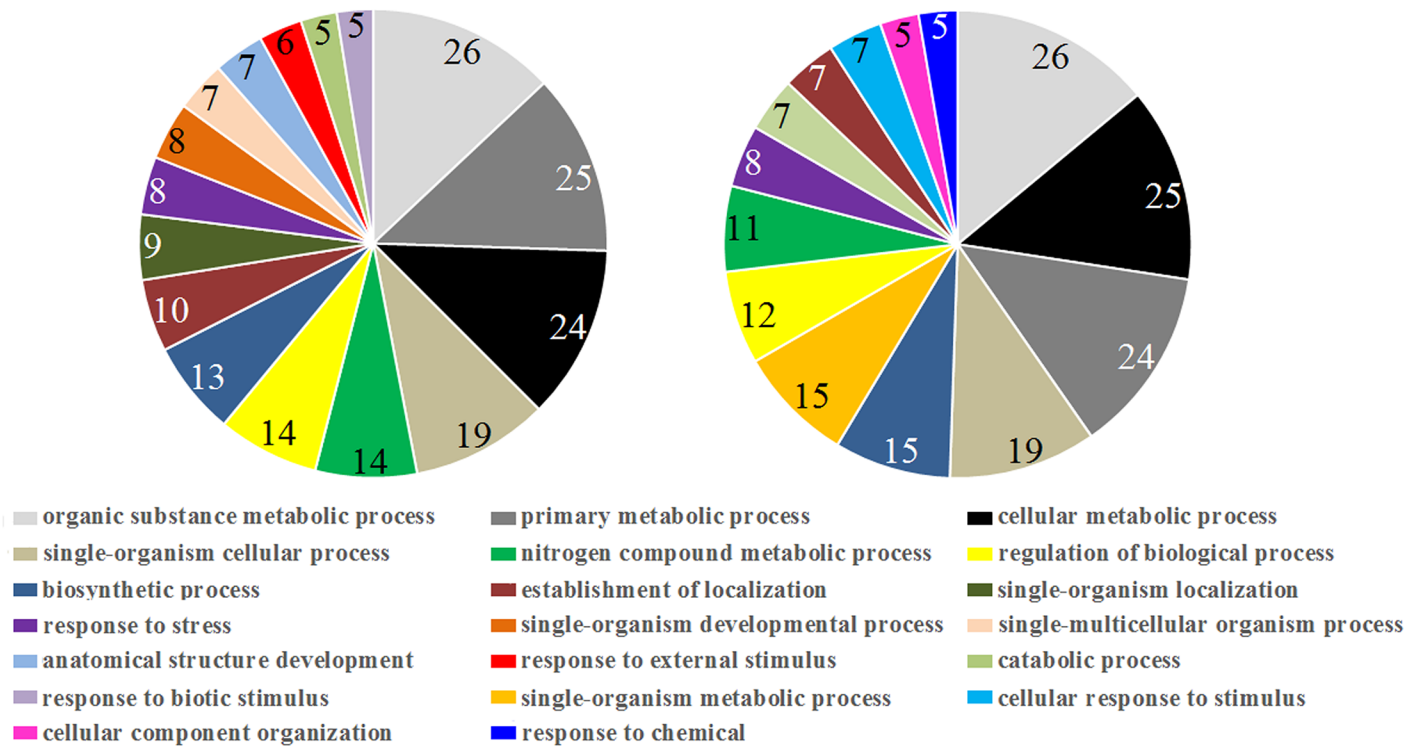

**Fig 5. GO terms belonging to the biological process domain attributed to ET-responsive genes in the latex.** (a) GO term classification of ET-responsive genes with fold-change values  $\geq 2$  ( $q$ -value  $< 0.05$ ) (b) GO term classification of ET-responsive genes with fold-change values  $\leq -2$  ( $q$ -value  $< 0.05$ ). GO term classifications populated by at least five genes were shown, and the number of genes annotated within each term was indicated.

doi:10.1371/journal.pone.0152039.g005

### ET promotes latex flow by increasing expression of genes related to laticifer water circulation

Efficient water inflow into laticifers is crucial for latex flow and production, since it is the determinant of the latex TSC and fluidity after rubber tree tapping [6, 61]. A significant increase in the duration of latex flow and a remarkable decrease in TSC were observed after ethephon stimulation (Fig 1b and 1d). The results indicated an enhanced water importation to the laticifers, which would cause the latex dilution and favor latex flow. As the vessel rings of mature laticifers are devoid of plasmodesmata, water circulation between laticifers and surrounding cells is believed to be governed by PIPs [30–32]. In the present study, the latex gene L2145 encoding HbPIP2;3, which is involved in exploited rubber trees laticifer water circulation and regulated by ET [30], was strongly up-regulated in ethephon-treated rubber trees. The results showed a similar gene expression pattern to previous researches, and indicated that the HbPIP2;3 might play an important role in water circulation and ET stimulation of latex production in rubber tree laticifers.

### ET delays the plugging of latex vessels by modifying expression of actin cytoskeleton assembly-related genes

Duration of latex flow is a key limiting factor of rubber yield [62], and is mainly determined by plugging formation at the end of severed latex vessels after tapping. The results demonstrated that ethephon stimulation can significantly increase the duration of latex flow and decrease the

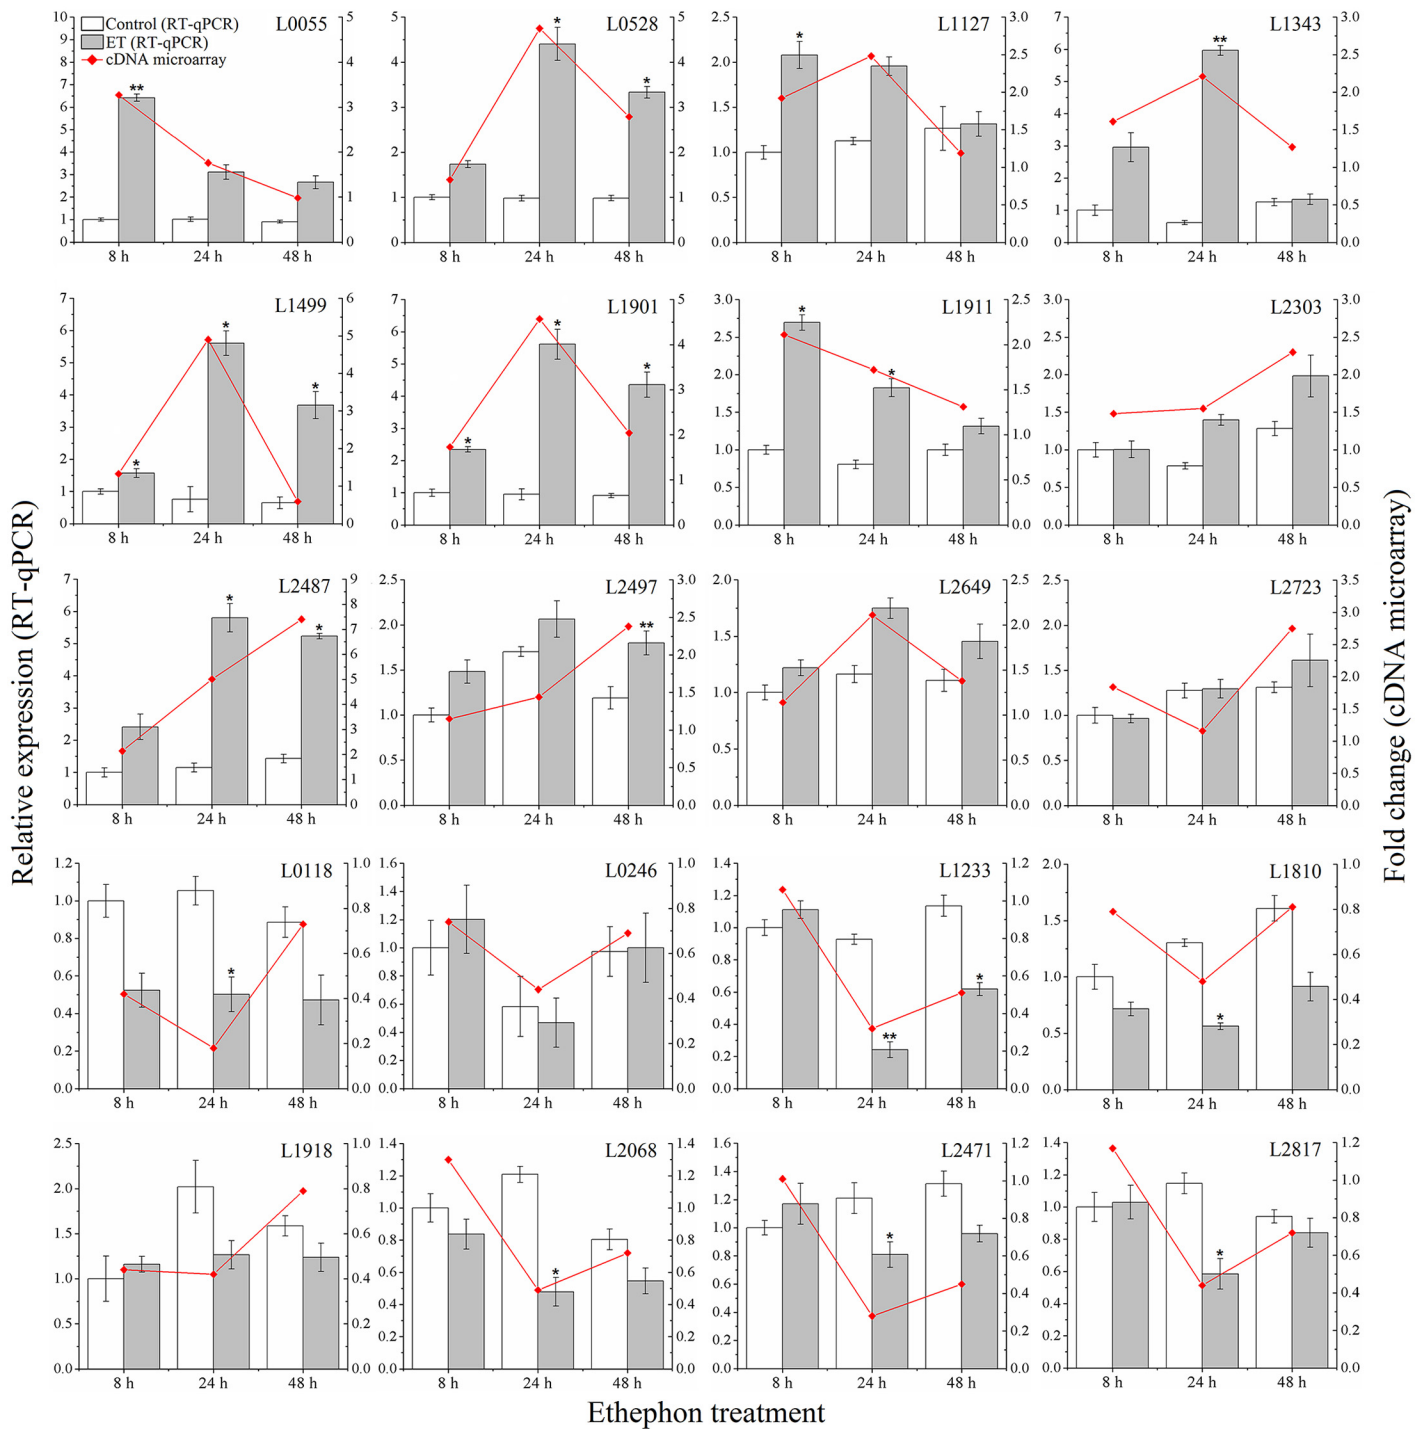

**Fig 6. Validation of cDNA microarray data using RT-qPCR.** The RT-qPCR analysis was performed as described in 'Materials and methods'. The transcript abundance of each gene was determined by RT-qPCR and the values were shown as the mean  $\pm$  standard deviation ( $n = 3$ ). Statistical significance was determined by Student's *t*-test using SPSS 19.0 software. Compared with the control, one asterisk showed a significant difference at  $p < 0.05$  and two asterisks at  $p < 0.01$ .

doi:10.1371/journal.pone.0152039.g006

**Table 3. Expression analysis of the rubber biosynthesis-related genes in the latex of the ethephon-treated rubber trees.**

| Gene ID | <i>H.brasiliensis</i> homolog | Description                                     | Fold Change |      |      | q-value |
|---------|-------------------------------|-------------------------------------------------|-------------|------|------|---------|
|         |                               |                                                 | 8 h         | 24 h | 48 h |         |
| L0291   |                               | cis-prenyltransferase                           | 0.99        | 0.41 | 0.79 | 0.00    |
| L1820   | JT937325.1                    | cis-prenyltransferase                           |             |      |      | >0.05   |
| L2531   | JT937656.1                    | farnesyl diphosphate synthase                   | 1.05        | 0.80 | 0.85 | 0.01    |
| L0288   | JT951018.1                    | rubber elongation factor                        | 1.07        | 0.56 | 0.63 | 0.00    |
| L0370   | JT976134.1                    | rubber elongation factor                        | 0.92        | 1.48 | 0.94 | 0.00    |
| L0659   | JT952916.1                    | rubber elongation factor                        | 1.34        | 0.76 | 0.77 | 0.00    |
| L0892   | JT948343.1                    | rubber elongation factor                        |             |      |      | >0.05   |
| L2039   | JT956147.1                    | rubber elongation factor                        | 0.80        | 0.85 | 0.89 | 0.01    |
| L2040   | JT939205.1                    | rubber elongation factor                        | 1.09        | 0.91 | 1.09 | 0.00    |
| L0823   | JT949604.1                    | small rubber particle protein                   | 1.17        | 1.05 | 1.03 | 0.04    |
| L1443   | JT952181.1                    | small rubber particle protein                   | 1.14        | 1.01 | 1.15 | 0.03    |
| L2308   | JT933647.1                    | acetyl-CoA C-acetyltransferase                  | 0.81        | 1.55 | 1.12 | 0.00    |
| L2728   | JT934477.1                    | acetyl-CoA C-acetyltransferase                  | 1.05        | 0.79 | 1.07 | 0.01    |
| L1887   | JT929060.1                    | 3-hydroxy-3-methylglutaryl coenzyme A synthase  | 0.66        | 0.79 | 1.12 | 0.00    |
| L1099   | JR346094.1                    | 3-hydroxy-3-methylglutaryl coenzyme A reductase |             |      |      | >0.05   |
| L1356   | JT929971.1                    | 3-hydroxy-3-methylglutaryl coenzyme A reductase |             |      |      | >0.05   |
| L1919   |                               | 3-hydroxy-4-methylglutaryl coenzyme A reductase | 1.42        | 1.04 | 1.15 | 0.00    |
| L2544   | JT933044.1                    | isopentenyl pyrophosphate isomerase             | 0.95        | 0.96 | 0.79 | 0.04    |
| L2266   | JT971226.1                    | mevalonate kinase                               |             |      |      | >0.05   |
| L1679   | JT933986.1                    | geranylgeranyl-diphosphate synthase             | 1.02        | 0.90 | 0.94 | 0.04    |
| L2442   | JT929251.1                    | geranylgeranyl-diphosphate synthase             | 1.16        | 1.18 | 1.05 | 0.04    |
| L1999   | JT928900.1                    | 5-phosphomevalonate kinase                      | 1.39        | 0.76 | 0.86 | 0.00    |
| L0593   | JT938439.1                    | mevalonate diphosphate decarboxylase            | 1.16        | 1.46 | 1.11 | 0.04    |

doi:10.1371/journal.pone.0152039.t003

plugging index of the unexploited rubber trees (Fig 1b and 1c). These results were similar to those of the tapped trees stimulated by ethephon [63], which indicates that ET can delay the plugging of latex vessels so as to prolong the duration of latex flow and favor latex flow. A protein-network constituted by an actin cytoskeleton forms at the end of severed laticifers, and plays a critical role in laticifer plugging [63]. In addition, the depolymerization of the actin cytoskeleton has been reported to stimulate the latex yield of rubber trees [84]. Profilin is an important member of the actin-binding proteins, and is best known as a regulator of actin filament non-equilibrium assembly and disassembly [85, 86]. In this study, two latex profilin genes (L0528 and L2649) were up-regulated in ethephon-treated rubber trees, and two formin protein genes were down-regulated. As an actin-binding protein, formin can interact with profilin and initiators of actin assembly, playing a central regulator role in actin polymerization [87, 88]. Taken all the results together, one suggestion is put forward that ET might modify the optimum equilibrium between unpolymerized actin molecules and assembled actin filaments by regulation of profilin and formin, which delays the plugging of laticifers and increases the latex production of the ethephon-treated rubber trees.

### Concluding Remarks

ET is a structurally simple gaseous hormone that regulates complex physiological processes of plants. Ethephon stimulation can induce remarkable physiological and biochemical changes within the laticiferous cells of rubber trees, which collectively contribute to increased latex

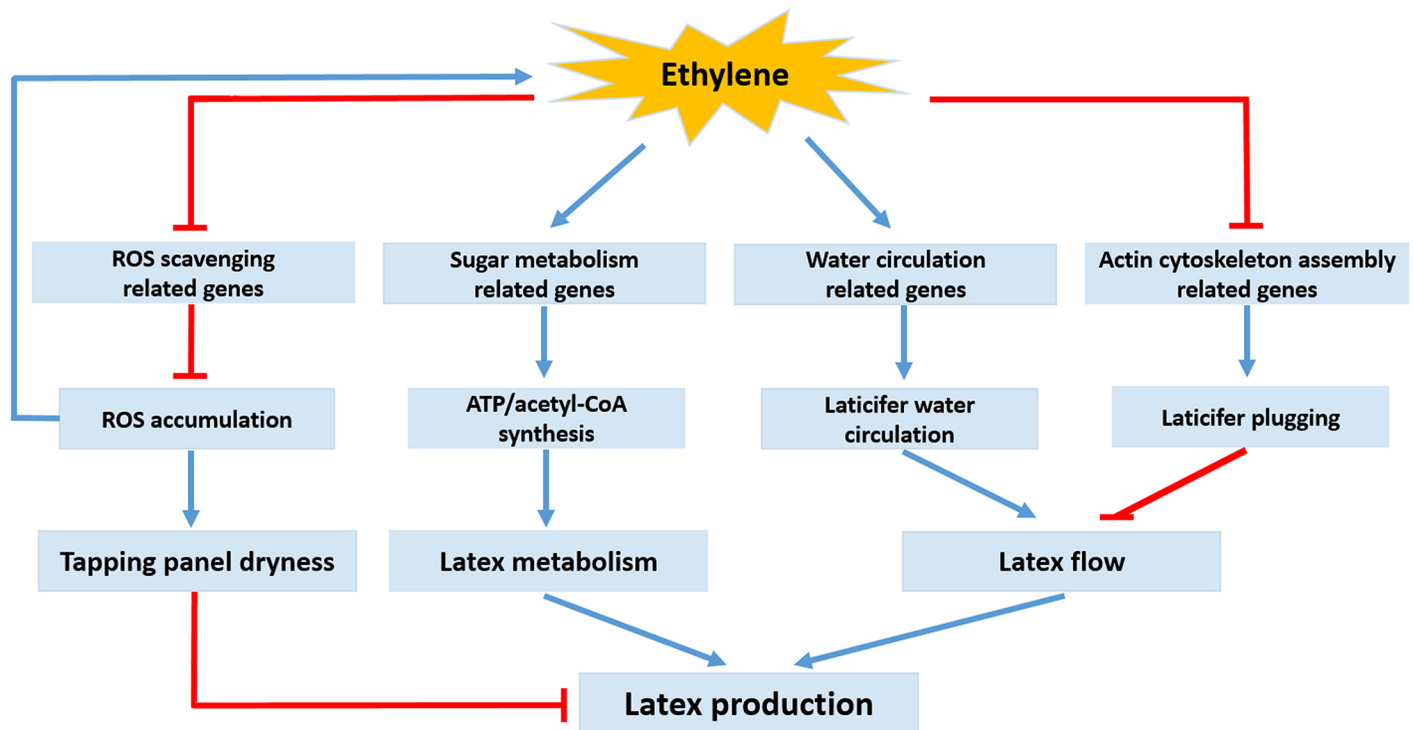

**Fig 7. Schematic diagram of possible mechanisms of ET responses in the laticifers of the mature virgin rubber trees based on the presented data and previous references.** ET stimulation up-regulates expression of sugar metabolism-related genes in the latex, which accelerates the importation and metabolism of sugar and improves the supply of carbon (e.g. acetyl-CoA) and energy (e.g. ATP) for rubber biosynthesis. In addition, ET favors promotion of latex flow by increasing expression of genes related to laticifer water circulation, and thus delays the plugging of the laticiferous ducts by modifying expression of genes related to actin cytoskeleton assembly, which prolongs the duration of latex flow and increases latex production. Nevertheless, ET stimulation can also down-regulate expression of several ROS scavenging-related genes, which may break the equilibrium between producing and scavenging of ROS, and result in rapid ROS accumulation in the laticifers. Excessive ROS accumulation would damage laticifers and initiate programmed cell death (apoptosis) of the laticifers, which might cause the TPD of rubber trees.

doi:10.1371/journal.pone.0152039.g007

production. Many laticifer-expressed genes that were regulated by ET were identified using a cDNA microarray in this research. The presented data suggest that ethephon increases the latex production of the mature virgin rubber trees mainly by regulating expression of many genes significantly involved in laticifer water circulation, production and scavenging of ROS, sugar metabolism and actin cytoskeleton assembly—rather than by regulating expression of genes involved directly in latex regeneration or rubber biosynthesis (Fig 7). Although mature virgin trees were used in this research, the altered gene expression profile in the laticifers of ethephon-treated rubber trees will also provide valuable insights into the molecular events and regulatory mechanisms by which ethephon stimulation increases the latex yield of *H. brasiliensis*.

### Supporting Information

**S1 Fig. Kinetics of latex yield (a), duration of latex flow (b), plugging index (c), TSC (d), sucrose content (e) and RSH content (f) subjected to different duration of ethephon treatment.** The latex yield and physiological parameters i.e., duration of latex flow, TSC, plugging index, sucrose content and RSH content were measured at 0, 1, 4, 48, 24 and 48 h after ethephon treatment. The values were shown as the means ± standard deviation (n = 3) for each including six trees. One-way ANOVA was performed using SPSS 19.0 software. The Student–Newman–Keuls test was used for multiple comparisons testing to investigate the

significant differences between groups. Bars with different letters were significantly different at the  $p < 0.05$  level.

(TIF)

**S1 Table. Oligonucleotide primers used for the RT-qPCR reactions in this study.**

(DOC)

**S2 Table. Detailed inventory of the probes used in the *H. brasiliensis* latex cDNA microarray.**

(DOC)

**S3 Table. Probe sequences of the *H. brasiliensis* latex cDNA microarray.**

(DOC)

**S4 Table. The differentially expressed genes in the laticifers of rubber trees stimulated with ethephon for 1 h.**

(DOC)

**S5 Table. The differentially expressed genes in the laticifers of rubber trees stimulated with ethephon for 4 h.**

(DOC)

## Author Contributions

Conceived and designed the experiments: RZZ CFD ZYN. Performed the experiments: ZYN GJK YL LJD. Analyzed the data: ZYN GJK RZZ. Contributed reagents/materials/analysis tools: ZYN GJK RZZ YL. Wrote the paper: ZYN RZZ.

## References

1. van Beilen JB, Poirier Y. Establishment of new crops for the production of natural rubber. *Trends Biotechnol.* 2007; 25: 522–529. PMID: [17936926](#)
2. Sakdapipanich JT. Structural characterization of natural rubber based on recent evidence from selective enzymatic treatments. *J Biosci Bioeng.* 2007; 103: 287–292. PMID: [17502267](#)
3. Cornish K, Wood DF, Windle JJ. Rubber particles from four different species examined by transmission electron microscopy and electron paramagnetic resonance spin labeling, are found to consist of a homogeneous rubber core enclosed by a contiguous, monolayer biomembrane. *Planta.* 1999; 210: 85–96. PMID: [10592036](#)
4. Cornish K. Similarities and differences in rubber biochemistry among plant species. *Phytochemistry.* 2001; 57: 1123–1134. PMID: [11430985](#)
5. Gomez JB, Moir GFJ. The ultracytology of latex vessels in *Hevea brasiliensis*. Kuala Lumpur, Malaysia: Malaysian Rubber Research and Development Board. 1979.
6. d'Auzac J, Jacob JL, Prévôt JC, Clément A, Gallois R, Chrestin H, et al. The regulation of *cis*-polyisoprene production (natural rubber) from *Hevea brasiliensis*. In: Pandalai SG, editor. *Recent research developments in plant physiology* Vol. 1. Trivandrum: Research Singpost; 1997. p. 273–332.
7. Kush A. Isoprenoid biosynthesis: the Hevea factory. *Plant Physiol Biochem.* 1994; 32: 761–767.
8. Liu Y, Wang H, Ye HC, Li GF. Advances in the plant isoprenoid biosynthesis pathway and its metabolic engineering. *J Integ Plant Biol.* 2005; 47: 769–782.
9. Adiwilaga K, Kush A. Cloning and characterization of cDNA encoding farnesyl diphosphate synthase from rubber tree (*Hevea brasiliensis*). *Plant Mol Biol.* 1996; 30: 935–946. PMID: [8639752](#)
10. Chow KS, Mat-Isa MN, Bahari A, Ghazali AK, Alias H, Zainuddin ZM, et al. Metabolic routes affecting rubber biosynthesis in *Hevea brasiliensis* latex. *J Exp Bot.* 2012; 63: 1863–1871. doi: [10.1093/jxb/er363](#) PMID: [22162870](#)
11. Chye ML, Tan CT, Chua NH. Three genes encode 3-hydroxy-3-methylglutaryl-coenzyme A reductase in *Hevea brasiliensis*: hmg1 and hmg3 are differentially expressed. *Plant Mol Biol.* 1992; 19: 473–484. PMID: [1377968](#)



12. Dennis MS, Light DR. Rubber elongation factor from *Hevea brasiliensis*. Identification, characterization, and role in rubber biosynthesis. *J Biol Chem*. 1989; 264: 18608–18617. PMID: [2681199](#)
13. Hillebrand A, Post JJ, Wurbs D, Wahler D, Lenders M, Krzyzanek V, et al. Down-regulation of small rubber particle protein expression affects integrity of rubber particles and rubber content in *Taraxacum brevicorniculatum*. *Plos One*. 2012; 7: e41874. doi: [10.1371/journal.pone.0041874](#) PMID: [22911861](#)
14. Post J, van Deenen N, Fricke J, Kowalski N, Wurbs D, Schaller H, et al. Laticifer-specific *cis*-prenyltransferase silencing affects the rubber, triterpene, and inulin content of *Taraxacum brevicorniculatum*. *Plant Physiol*. 2012; 158: 1406–1417. doi: [10.1104/pp.111.187880](#) PMID: [22238421](#)
15. Oh SK, Kang H, Shin DH, Yang J, Chow KS, Yeang HY, et al. Isolation characterization, and functional analysis of a novel cDNA clone encoding a small rubber particle protein from *Hevea brasiliensis*. *J Biol Chem*. 1999; 274: 17132–17138. PMID: [10358068](#)
16. Takaya A, Zhang YW, Asawatreratanakul K, Wititsuwannakul D, Wititsuwannakul R, Takahashi S, et al. Cloning, expression and characterization of a functional cDNA clone encoding geranylgeranyl diphosphate synthase of *Hevea brasiliensis*. *Biochim Biophys Acta*. 2003; 1625: 214–220. PMID: [12531482](#)
17. Tang C, Xiao X, Li H, Fan Y, Yang J, Qi J, et al. Comparative analysis of latex transcriptome reveals putative molecular mechanisms underlying super productivity of *Hevea brasiliensis*. *PLoS One*. 2013; 8: e75307. doi: [10.1371/journal.pone.0075307](#) PMID: [24066172](#)
18. Coupé M, Chrestin H. Physico-chemical and biochemical mechanisms of the hormonal (ethylene) stimulation. In: d'Auzac J, Jacob JL, Chrestin H, editor. *Physiology of Rubber Tree Latex*. Boca Raton, FL (USA): CRC Press Inc; 1989. pp. 295–319.
19. Zhu J, Zhang JL. Ethylene stimulation of latex production in *Hevea brasiliensis*. *Plant Signal Behav*. 2009; 4: 1072–1074. PMID: [20009550](#)
20. Amalou Z, Bangratz J, Chrestin H. Ethrel (Ethylene Releaser)-Induced Increases in the Adenylate Pool and Transtionoplast DeltapH within Hevea Latex Cells. *Plant Physiol*. 1992; 98: 1270–1276. PMID: [16668787](#)
21. Alessandro CM, Luiz Edson MO, Paulo M, Nelson DF. Anatomical characteristics and enzymes of the sucrose metabolism and their relationship with latex yield in the rubber tree (*Hevea brasiliensis* Muell. Arg.). *Braz J Plant Physiol*. 2006; 18: 263–268.
22. Lacote R, Gabla O, Obouayeba S, Eschbach JM, Rivano F, Dian K, et al. Long-term effect of ethylene stimulation on the yield of rubber trees is linked to latex cell biochemistry. *Field Crop Res*. 2010; 115: 94–98.
23. Silpi U, Lacoite A, Kasempap P, Thanysawanyangkura S, Chantuma P, Gohet E, et al. Carbohydrate reserves as a competing sink: evidence from tapping rubber trees. *Tree Physiol*. 2007; 27: 881–889. PMID: [17331906](#)
24. Tupy J, Primot L. Control of carbohydrate metabolism by ethylene in latex vessels of *Hevea brasiliensis* Muell. Arg. In relation to rubber production. *Biol Plantarum*. 1976; 18: 373–384.
25. Dusotoit-Coucaud A, Brunel N, Kongsawadworakul P, Viboonjun U, Lacoite A, Julien JL, et al. Sucrose importation into laticifers of *Hevea brasiliensis*, in relation to ethylene stimulation of latex production. *Ann. Bot*. 2009; 104: 635–647. doi: [10.1093/aob/mcp150](#) PMID: [19567416](#)
26. Dusotoit-Coucaud A, Kongsawadworakul P, Maurousset L, Viboonjun U, Brunel N, Pujade-Renaud V, et al. Ethylene stimulation of latex yield depends on the expression of a sucrose transporter (HbSUT1B) in rubber tree (*Hevea brasiliensis*). *Tree Physiol*. 2010; 30: 1586–1598. doi: [10.1093/treephys/tpq088](#) PMID: [20980289](#)
27. Tang C, Huang D, Yang J, Liu S, Sakr S, Li H, et al. The sucrose transporter HbSUT3 plays an active role in sucrose loading to laticifer and rubber productivity in exploited trees of *Hevea brasiliensis* (para rubber tree). *Plant Cell Environ*. 2010; 33: 1708–1720. doi: [10.1111/j.1365-3040.2010.02175.x](#) PMID: [20492551](#)
28. d'Auzac J. Tapping systems and area of drained bark. In: d'Auzac J, Jacob JL, Chrestin H, editor. *Physiology of Rubber Tree Latex*. Boca Raton, FL (USA): CRC Press Inc; 1989. pp. 221–232.
29. Lustinec J, Resing WL, Simmer J. Distinction of two components of the drainage area at the trunk level of *Hevea brasiliensis*. *Biol Plant*. 1968; 10: 284–293.
30. An F, Zou Z, Cai X, Wang J, Rookes J, Lin W, et al. Regulation of HbPIP2;3, a Latex-Abundant Water Transporter, Is Associated with Latex Dilution and Yield in the Rubber Tree (*Hevea brasiliensis* Muell. Arg.). *PLoS One*. 2015; 10: e0125595. doi: [10.1371/journal.pone.0125595](#) PMID: [25927524](#)
31. Tungngoen K, Kongsawadworakul P, Viboonjun U, Katsuhara M, Brunel N, Sakr S, et al. Involvement of HbPIP2;1 and HbTIP1;1 Aquaporins in ethylene stimulation of latex yield through regulation of water exchanges between inner liber and latex cells in *Hevea brasiliensis*. *Plant Physiol*. 2009; 151: 843–856. doi: [10.1104/pp.109.140228](#) PMID: [19656906](#)

32. Tungngoen K, Viboonjun U, Kongsawadworakul P, Katsuhara M, Julien JL, Sakr S, et al. Hormonal treatment of the bark of rubber trees (*Hevea brasiliensis*) increases latex yield through latex dilution in relation with the differential expression of two aquaporin genes. *J Plant Physiol.* 2011; 168: 253–262. doi: [10.1016/j.jplph.2010.06.009](https://doi.org/10.1016/j.jplph.2010.06.009) PMID: [20637523](https://pubmed.ncbi.nlm.nih.gov/20637523/)
33. Stepanova AN, Alonso JM. Ethylene signaling and response: where different regulatory modules meet. *Curr Opin Plant Biol.* 2009; 12: 548–555. doi: [10.1016/j.pbi.2009.07.009](https://doi.org/10.1016/j.pbi.2009.07.009) PMID: [19709924](https://pubmed.ncbi.nlm.nih.gov/19709924/)
34. Wang F, Cui X, Sun Y, Dong C. Ethylene signaling and regulation in plant growth and stress responses. *Plant Cell Rep.* 2013; 32: 1099–1109. doi: [10.1007/s00299-013-1421-6](https://doi.org/10.1007/s00299-013-1421-6) PMID: [23525746](https://pubmed.ncbi.nlm.nih.gov/23525746/)
35. Gidrol X, Chrestin H, Mounoury G, d'Auzac J. Early activation by ethylene of the tonoplast H-pumping ATPase in the latex from *Hevea brasiliensis*. *Plant Physiol.* 1988; 86: 899–903. PMID: [16666005](https://pubmed.ncbi.nlm.nih.gov/16666005/)
36. Chrestin H. Biochemical aspects of bark dryness induced by overstimulation of rubber trees with ethrel. In: d'Auzac J, Jacob JL, Chrestin H, editor. *Physiology of Rubber Tree Latex*. Boca Raton, FL (USA): CRC Press Inc; 1989. pp. 431–439.
37. Faridah Y, Siti AMA, Ghandimathi H. Changes in some physiological latex parameters in relation to over exploitation and onset of induced tapping panel dryness. *J Nat Rubber Res.* 1996; 10: 182–186.
38. Li D, Deng Z, Chen C, Xia Z, Wu M, He P, et al. Identification and characterization of genes associated with tapping panel dryness from *Hevea brasiliensis* latex using suppression subtractive hybridization. *BMC Plant Biol.* 2010; 10: 140. doi: [10.1186/1471-2229-10-140](https://doi.org/10.1186/1471-2229-10-140) PMID: [20618931](https://pubmed.ncbi.nlm.nih.gov/20618931/)
39. Schena M, Shalon D, Davis RW, Brown PO. Quantitative monitoring of gene expression patterns with a complementary DNA microarray. *Science.* 1995; 270: 467–470. PMID: [7569999](https://pubmed.ncbi.nlm.nih.gov/7569999/)
40. Martinez-Godoy MA, Mauri N, Juarez J, Marques MC, Santiago J, Forment J, et al. A genome-wide 20 K citrus microarray for gene expression analysis. *BMC Genomics.* 2008; 9: 318. doi: [10.1186/1471-2164-9-318](https://doi.org/10.1186/1471-2164-9-318) PMID: [18598343](https://pubmed.ncbi.nlm.nih.gov/18598343/)
41. Privat I, Bardil A, Gomez AB, Severac D, Dantec C, Fuentes I, et al. The 'PUCE CAFE' Project: the first 15 K coffee microarray, a new tool for discovering candidate genes correlated to agronomic and quality traits. *BMC Genomics.* 2011; 12: 5. doi: [10.1186/1471-2164-12-5](https://doi.org/10.1186/1471-2164-12-5) PMID: [21208403](https://pubmed.ncbi.nlm.nih.gov/21208403/)
42. Zhong GV, Burns JK. Profiling ethylene-regulated gene expression in *Arabidopsis thaliana* by microarray analysis. *Plant Mol Biol.* 2003; 53: 117–131. PMID: [14756311](https://pubmed.ncbi.nlm.nih.gov/14756311/)
43. De Paepe A, Vuylsteke M, Van Hummel P, Zabeau M, Van Der Straeten D. Transcriptional profiling by cDNA-AFLP and microarray analysis reveals novel insights into the early response to ethylene in *Arabidopsis*. *Plant J.* 2004; 39: 537–559. PMID: [15272873](https://pubmed.ncbi.nlm.nih.gov/15272873/)
44. Zeng RZ, Duan CF, Li XY, Tian WM, Nie ZY. Vacuolar-type inorganic pyrophosphatase located on the rubber particle in the latex is an essential enzyme in regulation of the rubber biosynthesis in *Hevea brasiliensis*. *Plant Sci.* 2009; 176: 602–607.
45. Nie ZY, Kang GJ, Li Y, Dai LJ, Zeng RZ. Whole-transcriptome survey of the putative ATP-binding cassette (ABC) transporter family genes in the latex-producing laticifers of *Hevea brasiliensis*. *PLoS One.* 2015; 10: e0116857. doi: [10.1371/journal.pone.0116857](https://doi.org/10.1371/journal.pone.0116857) PMID: [25615936](https://pubmed.ncbi.nlm.nih.gov/25615936/)
46. Eschbach JM, Roussel D, Van De Sype H, Jacob JL, d'Auzac J. Relationships between yield and clonal physiological characteristics of latex from *Hevea brasiliensis*. *Physiologie Vegetales.* 1984; 22: 295–304.
47. Milford GFJ, Paardekooper EC, Ho CY. Latex vessel plugging: Its importance to yield and clonal behavior. *J Rubb Res Inst Malaya.* 1969; 21, 274–282.
48. Duan CF, Zeng RZ, Nie ZY, Li Y, Wei XD. Construction and EST analysis of cDNA library from latex in *Hevea brasiliensis*. *Chin J Trop Crops.* 2007; 28: 46–51.
49. Pertea G, Huang X, Liang F, Antonescu V, Sultana R, Karamycheva S, et al. TIGR Gene Indices clustering tools (TGICL): a software system for fast clustering of large EST data sets. *Bioinformatics.* 2003; 19: 651–652. PMID: [12651724](https://pubmed.ncbi.nlm.nih.gov/12651724/)
50. Huang X, Madan A. CAP3: a DNA sequence assembly program. *Genome Res.* 1999; 9: 868–877. PMID: [10508846](https://pubmed.ncbi.nlm.nih.gov/10508846/)
51. Conesa A, Gotz S, Garcia-Gomez JM, Terol J, Talon M, Robles M. Blast2GO: a universal tool for annotation, visualization and analysis in functional genomics research. *Bioinformatics.* 2005; 21: 3674–3676. PMID: [16081474](https://pubmed.ncbi.nlm.nih.gov/16081474/)
52. Guo Y, Guo H, Zhang L, Xie H, Zhao X, Wang F, et al. Genomic analysis of anti-hepatitis B virus (HBV) activity by small interfering RNA and lamivudine in stable HBV-producing cells. *J Virol.* 2005; 79: 14392–14403. PMID: [16254373](https://pubmed.ncbi.nlm.nih.gov/16254373/)
53. Patterson TA, Lobenhofer EK, Fulmer-Smentek SB, Collins PJ, Chu TM, Bao W, et al. Performance comparison of one-color and two-color platforms within the MicroArray Quality Control (MAQC) project. *Nat Biotechnol.* 2006; 24: 1140–1150. PMID: [16964228](https://pubmed.ncbi.nlm.nih.gov/16964228/)

54. Shi YH, Zhu SW, Mao XZ, Feng JX, Qin YM, Zhang L, et al. Transcriptome profiling, molecular biological and physiological studies reveal a major role for ethylene in cotton fiber cell elongation. *Plant Cell*. 2006; 18: 651–664. PMID: [16461577](#)
55. Yang YH, Dudoit S, Luu P, Lin DM, Peng V, Ngai J, et al. Normalization for cDNA microarray data: a robust composite method addressing single and multiple slide systematic variation. *Nucleic Acids Res*. 2002; 30: e15. PMID: [11842121](#)
56. Tusher V, Tibshirani R, Chu G. Significance analysis of microarrays applied to transcriptional responses to ionizing radiation. *Proc Natl Acad Sci USA*. 2001; 98: 5116–5121. PMID: [11309499](#)
57. Eisen MB, Spellman PT, Brown PO, Botstein D. Cluster analysis and display of genome-wide expression patterns. *Proc Natl Acad Sci USA*. 1998; 95: 14863–14868. PMID: [9843981](#)
58. Duan CF, Rio M, Leclercq J, Bonnot F, Oliver G, Montoro P. Gene expression pattern in response to wounding, methyl jasmonate and ethylene in the bark of *Hevea brasiliensis*. *Tree Physiol*. 2010; 30: 1349–1359. doi: [10.1093/treephys/tpq066](#) PMID: [20660491](#)
59. Morey JS, Ryan JC, Van Dolah FM. Microarray validation: Factors influencing correlation between oligonucleotide microarrays and real-time PCR. *Biol Proced Online*. 2006; 8: 175–193. PMID: [17242735](#)
60. Jacob JL, Prevot JC, Roussel D, Lacrotte R, Serres E, d'Auzac J, Eschbach JM, Omont H. Yield-limiting factors, latex physiological parameters, latex diagnosis, and clonal typology. In: d'Auzac J, Jacob JL, Chrestin H, editor. *Physiology of Rubber Tree Latex*. Boca Raton, FL (USA): CRC Press Inc; 1989. pp. 345–382.
61. Gooding E. Studies in the physiology of latex II: latex flow on tapping *Hevea brasiliensis*-associated changes in trunk diameter and latex concentration. *New Phytol*. 1952; 51: 11–29.
62. d'Auzac J. Factors involved in the stopping of flow after tapping. In: d'Auzac J, Jacob JL, Chrestin H, editor. *Physiology of Rubber Tree Latex*. Boca Raton, FL (USA): CRC Press Inc; 1989. pp. 257–285.
63. Hao BZ, Wu JL, Meng CX, Gao ZQ, Tan HY. Laticifer wound plugging in *Hevea brasiliensis*: The role of a protein-network with rubber particle aggregations in stopping latex flow and protecting wounded laticifers. *J Rubber Res*. 2004; 7: 281–299.
64. Kekwick RGO. The formation of isoprenoids in *Hevea* latex. In: d'Auzac J, Jacob JL, Chrestin H, editor. *Physiology of Rubber Tree Latex*. Boca Raton, FL (USA): CRC Press Inc; 1989. pp. 146–164.
65. Dai L, Kang G, Li Y, Nie Z, Duan C, Zeng R. In-depth proteome analysis of the rubber particle of *Hevea brasiliensis* (para rubber tree). *Plant Mol Biol*. 2013; 82: 155–168. doi: [10.1007/s11103-013-0047-y](#) PMID: [23553221](#)
66. Chang C, Kwok SF, Bleecker AB, Meyerowitz EM. Arabidopsis ethylene-response gene ETR1: similarity of product to two-component regulators. *Science*. 1993; 262: 539–544. PMID: [8211181](#)
67. Kieber JJ, Rothenberg M, Roman G, Feldmann KA, Ecker JR. CTR1, a negative regulator of the ethylene response pathway in Arabidopsis, encodes a member of the raf family of protein kinases. *Cell*. 1993; 72: 427–441. PMID: [8431946](#)
68. Alonso JM, Hirayama T, Roman G, Nourizadeh S, Ecker JR. EIN2, a bifunctional transducer of ethylene and stress responses in Arabidopsis. *Science*. 1999; 284: 2148–2152. PMID: [10381874](#)
69. Guo H, Ecker JR. Plant responses to ethylene gas are mediated by SCF EBF1/EBF2-dependent proteolysis of EIN3 transcription factor. *Cell*. 2003; 115: 667–677. PMID: [14675532](#)
70. Solano R, Stepanova A, Chao Q, Ecker JR. Nuclear events in ethylene signaling: a transcriptional cascade mediated by ETHYLENE-INSENSITIVE3 and ETHYLENE-RESPONSE-FACTOR1. *Genes Dev*. 1998; 12: 3703–3714. PMID: [9851977](#)
71. Wang KLC, Li H, Ecker JR. Ethylene biosynthesis and signaling networks. *Plant Cell*. 2002; 14 (Suppl): S131–S151. PMID: [12045274](#)
72. Merchante C, Alonso JM, Stepanova AN. Ethylene signaling: simple ligand, complex regulation. *Curr Opin Plant Biol*. 2013; 16: 554–560. doi: [10.1016/j.pbi.2013.08.001](#) PMID: [24012247](#)
73. Duan C, Argout X, Gébelin V, Summo M, Dufayard JF, Leclercq J, et al. Identification of the *Hevea brasiliensis* AP2/ERF superfamily by RNA sequencing. *BMC Genomics*. 2013; 14: 30. doi: [10.1186/1471-2164-14-30](#) PMID: [23324139](#)
74. Li Z, Peng J, Wen X, Guo H. Ethylene-insensitive3 is a senescence-associated gene that accelerates age-dependent leaf senescence by directly repressing miR164 transcription in Arabidopsis. *Plant Cell*. 2013; 25: 3311–3328. doi: [10.1105/tpc.113.113340](#) PMID: [24064769](#)
75. Mittler R, Vanderauwera S, Gollery M, Breusegem FV. Reactive oxygen gene network of plants. *Trends Plant Sci*. 2004; 9: 490–498. PMID: [15465684](#)
76. Dat JF, Pellinen R, Beeckman T, Van De Cotte B, Langebartels C, Kangasjärvi J, et al. Changes in hydrogen peroxide homeostasis trigger an active cell death process in tobacco. *Plant J*. 2003; 33: 621–632. PMID: [12609037](#)

77. Apostol I, Heinstein PF, Low PS. Rapid stimulation of an oxidative burst during elicitation of cultured plant cells: role in defense and signal transduction. *Plant Physiol.* 1989; 90: 109–116. PMID: [16666719](#)
78. Lieberman M. Biosynthesis and action of ethylene. *Ann rev plant Physiol.* 1979; 30: 533–591.
79. Krishnakumar R, Ambily PK, Raghavan R, Annamalaiathan K, Jacob J. Ethylene stimulation aggravates tapping panel dryness in partially affected *Hevea* trees. *Journal of Plantation Crops.* 2008; 36: 315–321.
80. Krishnakumar R, Rittu M, Sreelatha S, Jacob J. Endogenous ethylene and oxidative stress in *Hevea brasiliensis*. In: Jacob J, Krishnakumar R, Mathew MM, editor. *Tapping Panel Dryness of Rubber Trees.* Kottayam (IND): Rubber Research Institute of India; 2006. p. 116–124.
81. Xuan YH, Hu YB, Chen L, Sosso D, Ducat DC, Hou B, et al. Functional role of oligomerization for bacterial and plant sweet sugar transporter family. *Proc Natl Acad Sci USA.* 2013; 110: E3685–E3694. doi: [10.1073/pnas.1311244110](#) PMID: [24027245](#)
82. Yang M, Wang S. Rice mtn3/saliva/sweet family genes and their homologs in cellular organisms. *Mol Plant.* 2013; 6: 665–674. doi: [10.1093/mp/sst035](#) PMID: [23430047](#)
83. Patel MS, Roche TE. Molecular biology and biochemistry of pyruvate dehydrogenase complexes. *FASEB J.* 1990; 4: 3224–3233. PMID: [2227213](#)
84. Gao Z, Meng C, Ye N. Latex production with depolymerizing compounds of actin cytoskeleton in rubber trees. *Pesquisa Agropecuária Brasileira.* 2008; 43: 275–279.
85. Valster AH, Pierson ES, Valenta R, Hepler PK, Emons A. Probing the plant actin cytoskeleton during cytokinesis and interphase by profilin microinjection. *Plant Cell.* 1997; 9: 1815–1824. PMID: [12237348](#)
86. Witke W. The role of profilin complexes in cell motility and other cellular processes. *Trends Cell Biol.* 2004; 14: 461–469. PMID: [15308213](#)
87. Clainche CL, Didry D, Egile C. Formin is a processive motor that requires profilin to accelerate actin assembly and associated ATP hydrolysis. *Cell.* 2004; 119: 419–429. PMID: [15507212](#)
88. Kovar DR, Pollard TD. Insertional assembly of actin filament barbed ends in association with formins produces piconewton forces. *Proc Natl Acad Sci USA.* 2004; 101: 14725–14730. PMID: [15377785](#)
